# Supplementary material for: A modeling study of the nonlinear response of fine particles to air pollutant emissions in the Beijing-Tianjin-Hebei region
Source: Copernicus journal article supplement (doi:10.5194/acp-2017-428), 2017-05-31
Supplement: Supplementary file 1 [file acp-2017-428-supplement.pdf]

# 1 **Supplementary Information for**

## 2 **A modeling study of the nonlinear response of fine** 3 **particles to air pollutant emissions in the Beijing-Tianjin-** 4 **Hebei region**

5  
6 **Bin Zhao<sup>1,2,3</sup>, Wenjing Wu<sup>1,2</sup>, Shuxiao Wang<sup>1,2</sup>, Jia Xing<sup>1,2</sup>, Xing Chang<sup>1,2</sup>, Kuo-**  
7 **Nan Liou<sup>3</sup>, Jonathan H. Jiang<sup>4</sup>, Yu Gu<sup>3</sup>, Carey Jang<sup>5</sup>, Joshua S. Fu<sup>6</sup>, Yun Zhu<sup>7</sup>,**  
8 **Jiandong Wang<sup>1,2</sup>, Jiming Hao<sup>1,2</sup>**

9 [1] School of Environment, and State Key Joint Laboratory of Environment Simulation and  
10 Pollution Control, Tsinghua University, Beijing 100084, China

11 [2] State Environmental Protection Key Laboratory of Sources and Control of Air Pollution  
12 Complex, Beijing 100084, China

13 [3] Joint Institute for Regional Earth System Science and Engineering and Department of  
14 Atmospheric and Oceanic Sciences, University of California, Los Angeles, CA 90095, USA

15 [4] Jet propulsion Laboratory, California Institute of Technology, Pasadena, CA 91109, USA

16 [5] U.S. Environmental Protection Agency, Research Triangle Park, NC 27711, USA

17 [6] Department of Civil and Environmental Engineering, University of Tennessee, Knoxville,  
18 TN 37996, United States

19 [7] School of Environmental Science and Engineering, South China University of  
20 Technology, Guangzhou 510006, China

21  
22 Correspondence to: Shuxiao Wang (shxwang@tsinghua.edu.cn)

### 23 24 **1 Evaluation of CMAQ/2D-VBS simulations**

25 The meteorological prediction lays the foundation for air quality simulation. In this study, the  
26 meteorological parameters simulated by WRFv3.7 are compared with the observational data  
27 obtained from the National Climatic Data Center (NCDC), where hourly or 3-h observations  
28 are available for 28 sites distributed within the inner domain. Due to the limited observational  
29 data available, the statistical evaluation was restricted to the temperature at 2 m, wind speed  
30 and wind direction at 10 m, and humidity at 2 m. The statistical indices used include the bias,

1 gross error (GE), root mean square error (RMSE), systematic RMSE (Sys RMSE),  
2 unsystematic RMSE (Unsys RMSE), and index of agreement (IOA). A detailed explanation  
3 of these indices can be found in Baker (2004).

4 Table S3 lists the model performance statistics and the benchmarks suggested by Emery et  
5 al. (2001). These benchmark values were derived based on performance statistics of the Fifth-  
6 Generation NCAR/Penn State Mesoscale Model (MM5) from a number of studies over the  
7 U.S. domain (mostly at grid resolution of 12km or 4km), and have been widely accepted in  
8 many regional air quality modeling studies. We expect these standards should also be  
9 applicable to our simulation domain. For wind speed, wind direction, and temperature, all  
10 statistical indices are within the benchmark range. For humidity, the GE for the July  
11 simulation slightly exceeds this benchmark (2.2 g/kg vs 2.0 g/kg) which might be due to the  
12 high humidity in summer, while all other statistical indices are within the benchmarks,  
13 indicating an acceptable performance. In summary, these statistics indicate an overall decent  
14 performance of meteorological predictions.

15 During the simulation period, the Ministry of Environmental Protection of China (MEP)  
16 has been publishing hourly PM<sub>2.5</sub> concentrations for 138 state-controlled observatioanl sites in  
17 the inner domain on its official website (<http://datacenter.mep.gov.cn>). We compare simulated  
18 monthly mean PM<sub>2.5</sub> concentrations with these observations, and employ a number of  
19 statistical indices including mean observation, mean simulation, normalized mean bias  
20 (NMB), normalized mean error (NME), mean fractional bias (MFB), and mean fractional  
21 error (MFE) to give a quantitative assessment of the model performance, as shown in Table  
22 S4. The definitions of these indices have been documented in previous papers (Wang et al.,  
23 2010; Boylan and Russell, 2006). It can be seen that the PM<sub>2.5</sub> concentrations are slightly  
24 underestimated in all months, with NMBs ranging between -24.8% and -2.6%, probably  
25 attributable to the exclusion of fugitive dust emissions. Boylan and Russell (2006) proposed  
26 that a model performance goal (the level of accuracy that is considered to be close to the best  
27 a model can be expected to achieve) was met if  $MFB \leq \pm 30\%$  and  $MFE \leq 50\%$ , and the model  
28 performance criteria (the level of accuracy that is considered to be acceptable for modeling  
29 applications) was met if  $MFB \leq \pm 60\%$  and  $MFE \leq 75\%$ . Table S4 shows that all the statistical  
30 indices meet the model performance goal, indicating a good modeling performance.

31 Having compared the monthly average PM<sub>2.5</sub> concentrations, we continue to evaluate  
32 simulated temporal variation of PM<sub>2.5</sub> concentrations. As described in Section 2.2 in the main  
33 text, we define 5 target regions for the development of the ERSM prediction system, i.e.,

1 Beijing, Tianjin, Northern Hebei, Eastern Hebei, and Southern Hebei. We select one  
2 representative site in each target region, and compared the hourly PM<sub>2.5</sub> simulations with  
3 observations, as shown in Figs. S1-S5. The figures show that the modeling system can capture  
4 the temporal variation of PM<sub>2.5</sub> concentrations fairly well. The correlation coefficients range  
5 between 0.49 and 0.83 in January, March, and October, indicating good model performance.  
6 The correlation coefficients are relatively lower in July (0.21-0.49), in association with the  
7 relatively large discrepancies in meteorological simulations. Despite the lower correlation  
8 coefficients in July, the absolute errors are still acceptable considering the smaller PM<sub>2.5</sub>  
9 concentrations during summer.

10 Furthermore, we compare the simulated concentrations of major PM<sub>2.5</sub> chemical  
11 components with observational data at 7 sites in the inner domain (unpublished data of  
12 Tsinghua University). The model performance statistics are summarized in Table S5. NO<sub>3</sub><sup>-</sup>  
13 concentrations are overestimated (NMB = 16.3%), while SO<sub>4</sub><sup>2-</sup> concentrations are  
14 underestimated (NMB = -47.5%). There is a 25.1% underestimation in NH<sub>4</sub><sup>+</sup> concentrations.  
15 The overestimation of NO<sub>3</sub><sup>-</sup> and underestimation for SO<sub>4</sub><sup>2-</sup> are consistent with previous studies  
16 over East Asia, probably attributed to the lack of some chemical formation pathways in the  
17 modeling system, such as SO<sub>2</sub> heterogeneous reactions on the dust surface and the oxidation  
18 of SO<sub>2</sub> by NO<sub>2</sub> in aerosol water (Wang et al., 2013; Fu et al., 2016; Cheng et al., 2016).  
19 Elemental carbon (EC) concentrations are remarkably overestimated by 86.6%. EC  
20 concentrations are strongly affected by local emissions, while the spatial distribution of our  
21 emission inventory may not sufficiently capture local emission sources surrounding  
22 observational sites, leading to model-observation discrepancy. The overestimation may also  
23 be attributable to the absence of EC aging in CMAQ/2D-VBS, which leads to reduced  
24 fraction of hydrophilic EC and thus reduced wet deposition. Finally, concentrations of organic  
25 carbon (OC) are underestimated by 36.8%, although the CMAQ/2D-VBS model has been  
26 demonstrated to significantly reduce the underestimation in OC as compared to the default  
27 CMAQ model (Zhao et al., 2016). Future studies are needed to further improve the OC  
28 simulation results. Similar to the evaluation of PM<sub>2.5</sub> simulations, we also adopt the  
29 benchmarks proposed by Boylan and Russell (2006). Since Boylan and Russell (2006)  
30 suggested that less abundant species would have less stringent performance goals and criteria  
31 than PM<sub>10</sub>/PM<sub>2.5</sub>, we just adopt the model performance criteria (MFB ≤ ±60% and MFE ≤  
32 75%) described above. Table S5 shows that all the statistical indices meet the model  
33 performance criteria, indicating an overall decent model performance.

## 2 Selection of heavy-pollution episodes

We collect hourly PM<sub>2.5</sub> concentrations at 138 state-controlled monitoring sites over the Beijing-Tianjin-Hebei (BTH) region during 2013-2015 from the Ministry of Environmental Protection (MEP) data center (<http://datacenter.mep.gov.cn/>). The daily-average PM<sub>2.5</sub> concentrations for each prefecture-level city are subsequently calculated. For any given day, it is regarded as a regional heavy-pollution day if over 75% prefecture-level cities have daily-average PM<sub>2.5</sub> concentrations larger than 75 μg/m<sup>3</sup>. If three or more continuous days are identified as heavy-pollution days, these days are treated as a regional heavy-pollution episode. In total, 47 regional heavy-pollution episodes are selected.

We subsequently employ the HYSPLIT model (Hybrid Single Particle Lagrangian Integrated Trajectory Model) to identify potential source regions of the heavy-pollution episodes. The HYSPLIT model provides the best-guess transport trajectory for an air parcel to arrive at a target location, based on meteorological data. It has been widely used in atmospheric studies including those conducted in the BTH region (Zhang et al., 2013; Jin et al., 2016; Yao et al., 2016). Since Beijing is located in the central part of the BTH region, we select Beijing urban center (39.95N, 116.43E) as the target location for the calculation of transport trajectory. It is noted, however, the calculated trajectories generally reflect the large-scale meteorological patterns which affects the air pollutant transport over the entire BTH region rather than just Beijing; this can be confirmed from the source attribution results during three typical episodes (Section 3.4 of the main text). For each heavy-pollution day and each of two heights (500 m and 1000 m), the trajectories are simulated at four time points, i.e., 0:00, 6:00, 12:00, and 18:00. Each trajectory is calculated for the last 72 hours at 1-h time resolution. The model is driven by meteorological fields obtained from NCEP GDAS (Global Data Assimilation System) at 1° × 1° resolution. While the HYSPLIT model can only calculate the transport trajectories, the Concentration Weighted Trajectory (CWT) method, an improved back trajectory method, enables a quantitative estimation of the contribution from various source regions (Wang et al., 2015). On the basis of the HYSPLIT simulation results, we further use the CWT method to estimate the contribution of each source region to PM<sub>2.5</sub> concentrations at the target location.

Table S7 summarizes the potential source regions of the 47 heavy-pollution episodes. It is clear that the source regions with the highest occurrence frequencies are South (74.5%), Local (57.4%), Northwest (29.8%), Southeast (10.6%), West (8.5%), and North (4.3%). In this study, we selected (1) January 5-7, 2014, (2) October 7-11, 2014, and (3) October 29-31,

1 2014 as representatives for the Local, South, and Southeast types. For the heavy-pollution  
2 episodes with major contribution from the Northwest, our back trajectory analysis indicate  
3 that the air mass usually originates from some desert regions. We do not include this type in  
4 our analysis because (1) such dust episodes dominated by coarse particles are different from  
5 the haze episodes this paper focuses on; (2) the ERSM prediction system developed in this  
6 study mainly covers the BTH region, and the long-range transport from the northwestern  
7 provinces is beyond the focus of this study.

8

9

## 10 **References**

- 11 Baker, K.: Meteorological Modeling Protocol for Application to PM<sub>2.5</sub>/Haze/Ozone  
12 Modeling Projects[R/OL]:  
13 [http://www.epa.state.oh.us/portals/27/SIP/Attain/D8\\_Meteorological\\_Modeling\\_Protoc](http://www.epa.state.oh.us/portals/27/SIP/Attain/D8_Meteorological_Modeling_Protocol.pdf)  
14 [ol.pdf](http://www.epa.state.oh.us/portals/27/SIP/Attain/D8_Meteorological_Modeling_Protocol.pdf), access: 2015-03-01, 2004.
- 15 Boylan, J. W., and Russell, A. G.: PM and light extinction model performance metrics, goals,  
16 and criteria for three-dimensional air quality models, *Atmos Environ*, 40, 4946-4959,  
17 DOI 10.1016/j.atmosenv.2005.09.087, 2006.
- 18 Cheng, Y. F., Zheng, G. J., Wei, C., Mu, Q., Zheng, B., Wang, Z. B., Gao, M., Zhang, Q., He,  
19 K. B., Carmichael, G., Pöschl, U., and Su, H.: Reactive nitrogen chemistry in aerosol  
20 water as a source of sulfate during haze events in China, *Science Advances*, 2, e1601530,  
21 DOI: 10.1126/sciadv.1601530, 2016.
- 22 Emery, C., Tai, E., and Yarwood, G.: Enhanced meteorological modeling and performance  
23 evaluation for two Texas episodes. Report to the Texas Natural Resources Conservation  
24 Commission:  
25 [http://www.tceq.state.tx.us/assets/public/implementation/air/am/contracts/reports/mm/E](http://www.tceq.state.tx.us/assets/public/implementation/air/am/contracts/reports/mm/EnhancedMetModelingAndPerformanceEvaluation.pdf)  
26 [nhancedMetModelingAndPerformanceEvaluation.pdf](http://www.tceq.state.tx.us/assets/public/implementation/air/am/contracts/reports/mm/EnhancedMetModelingAndPerformanceEvaluation.pdf), access: 2015-03-01, 2001.
- 27 Fu, X., Wang, S. X., Chang, X., Cai, S. Y., Xing, J., and Hao, J. M.: Modeling analysis of  
28 secondary inorganic aerosols over China: pollution characteristics, and meteorological  
29 and dust impacts, *Sci Rep-Uk*, 6, 10.1038/srep35992, 2016.
- 30 Jin, X. C., Xiao, C. J., Li, J., Huang, D. H., Yuan, G. J., Yao, Y. G., Wang, X. H., Hua, L.,  
31 Zhang, G. Y., Cao, L., Wang, P. S., and Ni, B. F.: Source apportionment of PM<sub>2.5</sub> in  
32 Beijing using positive matrix factorization, *Journal of Radioanalytical and Nuclear*  
33 *Chemistry*, 307, 2147-2154, 10.1007/s10967-015-4544-0, 2016.
- 34 Wang, L. T., Jang, C., Zhang, Y., Wang, K., Zhang, Q. A., Streets, D., Fu, J., Lei, Y.,  
35 Schreifels, J., He, K. B., Hao, J. M., Lam, Y. F., Lin, J., Meskhidze, N., Voorhees, S.,  
36 Evarts, D., and Phillips, S.: Assessment of air quality benefits from national air pollution  
37 control policies in China. Part II: Evaluation of air quality predictions and air quality  
38 benefits assessment, *Atmos Environ*, 44, 3449-3457, DOI  
39 10.1016/j.atmosenv.2010.05.058, 2010.
- 40 Wang, Y., Zhang, Q. Q., He, K., Zhang, Q., and Chai, L.: Sulfate-nitrate-ammonium aerosols  
41 over China: response to 2000-2015 emission changes of sulfur dioxide, nitrogen oxides,  
42 and ammonia, *Atmos Chem Phys*, 13, 2635-2652, DOI 10.5194/acp-13-2635-2013,  
43 2013.

- 1 Wang, Y., Wang, G. C., and Chen, L.: Transportation source and transportation process of  
2 PM10 and PM2.5 in seasons of Jinan, *Environ Sci Technol*, 38, 175-182, 2015.
- 3 Yao, L., Yang, L. X., Yuan, Q., Yan, C., Dong, C., Meng, C. P., Sui, X., Yang, F., Lu, Y. L.,  
4 and Wang, W. X.: Sources apportionment of PM2.5 in a background site in the North  
5 China Plain, *Sci Total Environ*, 541, 590-598, 10.1016/j.scitotenv.2015.09.123, 2016.
- 6 Zhang, R., Jing, J., Tao, J., Hsu, S. C., Wang, G., Cao, J., Lee, C. S. L., Zhu, L., Chen, Z.,  
7 Zhao, Y., and Shen, Z.: Chemical characterization and source apportionment of PM2.5  
8 in Beijing: seasonal perspective, *Atmos Chem Phys*, 13, 7053-7074, 10.5194/acp-13-  
9 7053-2013, 2013.
- 10 Zhao, B., Wang, S. X., Donahue, N. M., Jathar, S. H., Huang, X. F., Wu, W. J., Hao, J. M.,  
11 and Robinson, A. L.: Quantifying the effect of organic aerosol aging and intermediate-  
12 volatility emissions on regional-scale aerosol pollution in China, *Sci Rep-Uk*, 6,  
13 10.1038/srep28815, 2016.
- 14  
15

1 **Tables and figures**

2 Table S1. Emissions of major air pollutants in prefecture-level cities over the BTH region in  
3 2014 (kt yr<sup>-1</sup>).

|              | NO <sub>x</sub> | SO <sub>2</sub> | NMVOC  | NH <sub>3</sub> | PM <sub>10</sub> | PM <sub>2.5</sub> | BC    | OC    |
|--------------|-----------------|-----------------|--------|-----------------|------------------|-------------------|-------|-------|
| Beijing      | 343.6           | 166.0           | 357.7  | 52.2            | 79.4             | 55.5              | 13.3  | 11.6  |
| Tianjin      | 344.6           | 240.3           | 338.0  | 45.4            | 148.2            | 111.6             | 16.3  | 25.8  |
| Shijiazhuang | 255.4           | 169.8           | 239.7  | 85.2            | 198.5            | 146.1             | 23.9  | 33.5  |
| Chengde      | 76.5            | 39.6            | 56.8   | 32.7            | 47.4             | 35.7              | 6.1   | 9.7   |
| Zhangjiakou  | 96.8            | 46.5            | 57.2   | 33.8            | 52.0             | 39.5              | 6.9   | 11.4  |
| Qinhuangdao  | 66.7            | 33.9            | 52.2   | 21.8            | 39.3             | 29.7              | 5.3   | 8.1   |
| Tangshan     | 247.9           | 125.8           | 186.0  | 66.1            | 129.3            | 96.2              | 15.3  | 24.1  |
| Langfang     | 80.5            | 60.8            | 104.7  | 33.8            | 84.9             | 62.7              | 10.5  | 14.4  |
| Baoding      | 165.0           | 107.1           | 201.5  | 87.0            | 151.4            | 115.4             | 20.4  | 32.3  |
| Cangzhou     | 144.1           | 102.6           | 170.0  | 66.0            | 144.7            | 107.0             | 17.3  | 24.6  |
| Hengshui     | 78.4            | 56.3            | 93.1   | 49.1            | 81.3             | 60.8              | 9.8   | 14.9  |
| Xingtai      | 142.4           | 91.6            | 114.6  | 58.9            | 98.7             | 74.9              | 12.8  | 20.9  |
| Handan       | 198.4           | 102.2           | 148.9  | 80.0            | 112.3            | 86.0              | 14.9  | 25.5  |
| Total        | 2240.3          | 1342.4          | 2120.4 | 712.0           | 1367.5           | 1021.2            | 172.7 | 256.9 |

4

1 Table S2. Provincial emissions of major air pollutants in China in 2014 (kt yr<sup>-1</sup>).

|                | NO <sub>x</sub> | SO <sub>2</sub> | NMVOC | NH <sub>3</sub> | PM <sub>10</sub> | PM <sub>2.5</sub> | BC   | OC   |
|----------------|-----------------|-----------------|-------|-----------------|------------------|-------------------|------|------|
| Beijing        | 344             | 166             | 358   | 52              | 79               | 55                | 13   | 12   |
| Tianjin        | 345             | 240             | 338   | 45              | 148              | 112               | 16   | 26   |
| Hebei          | 1552            | 936             | 1425  | 627             | 1140             | 854               | 143  | 219  |
| Shanxi         | 934             | 979             | 692   | 197             | 789              | 578               | 127  | 146  |
| Inner Mongolia | 1146            | 1088            | 665   | 366             | 656              | 492               | 112  | 140  |
| Liaoning       | 1155            | 885             | 1099  | 382             | 641              | 477               | 68   | 130  |
| Jilin          | 656             | 369             | 502   | 272             | 479              | 360               | 52   | 105  |
| Heilongjiang   | 755             | 301             | 655   | 346             | 578              | 456               | 78   | 172  |
| Shanghai       | 353             | 528             | 725   | 41              | 141              | 96                | 10   | 9    |
| Jiangsu        | 1599            | 983             | 2085  | 462             | 977              | 707               | 80   | 168  |
| Zhejiang       | 1110            | 1138            | 1675  | 173             | 443              | 299               | 32   | 50   |
| Anhui          | 1176            | 591             | 1081  | 417             | 863              | 651               | 91   | 221  |
| Fujian         | 799             | 503             | 711   | 167             | 341              | 240               | 28   | 51   |
| Jiangxi        | 623             | 397             | 499   | 239             | 474              | 312               | 38   | 70   |
| Shandong       | 2717            | 2334            | 2529  | 790             | 1530             | 1120              | 164  | 258  |
| Henan          | 1932            | 1036            | 1480  | 954             | 1379             | 1004              | 130  | 232  |
| Hubei          | 1234            | 1201            | 982   | 435             | 877              | 628               | 110  | 171  |
| Hunan          | 952             | 839             | 828   | 483             | 792              | 562               | 91   | 151  |
| Guangdong      | 1685            | 1032            | 1683  | 365             | 686              | 478               | 56   | 115  |
| Guangxi        | 736             | 743             | 728   | 352             | 660              | 494               | 46   | 123  |
| Hainan         | 139             | 96              | 146   | 59              | 64               | 46                | 4    | 11   |
| Chongqing      | 551             | 998             | 418   | 175             | 352              | 253               | 38   | 71   |
| Sichuan        | 1172            | 1661            | 1282  | 786             | 876              | 671               | 98   | 254  |
| Guizhou        | 676             | 1062            | 380   | 249             | 565              | 431               | 87   | 137  |
| Yunnan         | 681             | 483             | 449   | 337             | 457              | 339               | 54   | 94   |
| Tibet          | 27              | 6               | 16    | 98              | 12               | 9                 | 1    | 3    |
| Shaanxi        | 749             | 748             | 585   | 211             | 527              | 396               | 79   | 127  |
| Gansu          | 405             | 286             | 286   | 165             | 307              | 235               | 36   | 69   |
| Qinghai        | 125             | 52              | 61    | 86              | 82               | 62                | 8    | 12   |
| Ningxia        | 210             | 215             | 100   | 40              | 135              | 96                | 14   | 16   |
| Xinjiang       | 886             | 861             | 405   | 248             | 400              | 296               | 47   | 78   |
| Total          | 27422           | 22754           | 24867 | 9621            | 17450            | 12812             | 1953 | 3441 |

2



1 Table S3. Performance statistics for meteorological variables.

| Variable       | Index      | Unit | Jan    | Mar    | Jul    | Oct    | Benchmark      |
|----------------|------------|------|--------|--------|--------|--------|----------------|
| Wind Speed     | Mean OBS   | m/s  | 2.68   | 2.95   | 2.53   | 2.40   |                |
|                | Mean SIM   | m/s  | 2.81   | 3.06   | 2.66   | 2.63   |                |
|                | Bias       | m/s  | 0.13   | 0.11   | 0.13   | 0.24   | $\leq \pm 0.5$ |
|                | GE         | m/s  | 1.23   | 1.25   | 1.19   | 1.11   | $\leq 2$       |
|                | RMSE       | m/s  | 1.86   | 1.76   | 1.6    | 1.58   | $\leq 2$       |
|                | Sys RMSE   | m/s  | 1.4    | 1.12   | 1.13   | 1.11   |                |
|                | Unsys RMSE | m/s  | 1.2    | 1.33   | 1.11   | 1.10   |                |
|                | IOA        |      | 0.67   | 0.73   | 0.65   | 0.71   | $\geq 0.6$     |
| Wind Direction | Mean OBS   | °    | 230.79 | 239.51 | 205.37 | 195.17 |                |
|                | Mean SIM   | °    | 249.28 | 220    | 201.04 | 195.10 |                |
|                | Bias       | °    | 2.99   | 0.49   | -3.45  | 2.76   | $\leq \pm 10$  |
| Temperature    | Mean OBS   | K    | 270.3  | 280.64 | 298.54 | 285.70 |                |
|                | Mean SIM   | K    | 270.03 | 280.33 | 298.54 | 285.92 |                |
|                | Bias       | K    | -0.27  | -0.3   | 0      | 0.21   | $\leq \pm 0.5$ |
|                | GE         | K    | 1.41   | 1.66   | 1.75   | 1.34   | $\leq 2$       |
|                | RMSE       | K    | 1.86   | 2.28   | 2.38   | 1.81   |                |
|                | Sys RMSE   | K    | 0.43   | 0.52   | 0.51   | 0.47   |                |
|                | Unsys RMSE | K    | 1.79   | 2.21   | 2.31   | 1.73   |                |
|                | IOA        |      | 0.97   | 0.97   | 0.94   | 0.97   | $\geq 0.8$     |
| Humidity       | Mean OBS   | g/kg | 1.54   | 2.83   | 14     | 6.02   |                |
|                | Mean SIM   | g/kg | 1.66   | 2.82   | 13.01  | 5.49   |                |
|                | Bias       | g/kg | 0.12   | -0.01  | -0.99  | -0.53  | $\leq \pm 1$   |
|                | GE         | g/kg | 0.32   | 0.58   | 2.2    | 1.01   | $\leq 2$       |
|                | RMSE       | g/kg | 0.47   | 0.81   | 2.8    | 1.38   |                |
|                | Sys RMSE   | g/kg | 0.23   | 0.44   | 1.76   | 0.92   |                |
|                | Unsys RMSE | g/kg | 0.4    | 0.67   | 2.12   | 0.96   |                |
|                | IOA        |      | 0.86   | 0.85   | 0.76   | 0.81   | $\geq 0.6$     |

2

1 Table S4. Statistical results for the comparison of monthly PM<sub>2.5</sub> concentrations simulated by  
 2 CMAQ/2D-VBS with surface observations.

|         | Jan   | Mar   | Jul  | Oct  | Model performance goal <sup>a</sup> | Model performance criteria <sup>a</sup> |
|---------|-------|-------|------|------|-------------------------------------|-----------------------------------------|
| NMB (%) | -24.8 | -21.3 | -4.2 | -2.6 | -                                   | -                                       |
| NME (%) | 27.7  | 24.8  | 19.3 | 25.0 | -                                   | -                                       |
| MFB (%) | -29.4 | -24.1 | -7.8 | -1.9 | ≤ ± 30                              | ≤ ± 60                                  |
| MFE (%) | 33.4  | 28.7  | 22.7 | 24.8 | ≤ 50                                | ≤ 75                                    |
| R       | 0.64  | 0.73  | 0.64 | 0.58 | -                                   | -                                       |

3 <sup>a</sup> The model performance goals and model performance criteria are adopted from Boylan and Russell  
 4 (2006).

6 Table S5. Statistical results for the comparison of PM<sub>2.5</sub> chemical component concentrations  
 7 simulated by CMAQ/2D-VBS with observations at 7 surface sites over the BTH region.

|         | NO <sub>3</sub> <sup>-</sup> | SO <sub>4</sub> <sup>2-</sup> | NH <sub>4</sub> <sup>+</sup> | OC    | EC    | Model performance criteria <sup>a</sup> |
|---------|------------------------------|-------------------------------|------------------------------|-------|-------|-----------------------------------------|
| NMB (%) | 16.3                         | -47.5                         | -25.1                        | -36.8 | 86.6  | -                                       |
| NME (%) | 67.7                         | 60.6                          | 56.9                         | 52.8  | 98.6  | -                                       |
| MFB (%) | -2.6                         | -51.3                         | -37.7                        | -48.4 | 57.2  | ≤ ± 60                                  |
| MFE (%) | 65.6                         | 76.4                          | 74.2                         | 71.2  | 67.3  | ≤ 75                                    |
| R       | 0.681                        | 0.637                         | 0.638                        | 0.412 | 0.389 | -                                       |

8 <sup>a</sup> The model performance criteria are adopted from Boylan and Russell (2006).

10 Table S6. Description of out-of-sample scenarios

| Case number | Description                                                                                                                                                                                                                                                                                                                                                                                                                              |
|-------------|------------------------------------------------------------------------------------------------------------------------------------------------------------------------------------------------------------------------------------------------------------------------------------------------------------------------------------------------------------------------------------------------------------------------------------------|
| 1-6         | Control variables of precursors in Beijing change but the other variables stay the same as the base case. For case 1-3, the emission ratios (defined as the ratios of the changed emissions to the emissions in the base case) of all control variables of precursors in Beijing are set to 0.1, 0.5, and 1.15, respectively. Case 4-6 are generated randomly by applying LHS method for the control variables of precursors in Beijing. |
| 7-12        | The same as case 1-6 but for Tianjin.                                                                                                                                                                                                                                                                                                                                                                                                    |
| 13-18       | The same as case 1-6 but for Northern Hebei.                                                                                                                                                                                                                                                                                                                                                                                             |
| 19-24       | The same as case 1-6 but for Eastern Hebei.                                                                                                                                                                                                                                                                                                                                                                                              |
| 25-30       | The same as case 1-6 but for Southern Hebei.                                                                                                                                                                                                                                                                                                                                                                                             |
| 31-40       | Control variables of precursors change randomly (with LHS method applied) but those of primary inorganic PM <sub>2.5</sub> stay the same as the base case.                                                                                                                                                                                                                                                                               |
| 41-44       | Control variables of primary inorganic PM <sub>2.5</sub> change randomly (with LHS method applied) but those of precursors stay the same as the base case.                                                                                                                                                                                                                                                                               |
| 45-54       | These cases are generated randomly by applying LHS method for all control variables.                                                                                                                                                                                                                                                                                                                                                     |

11

12

1 Table S7. Identification of potential source regions for 47 heavy-pollution episodes during  
 2 2013-2015 over the BTH region.

| NO. | Year | Period                       | Potential source region                                                                  |
|-----|------|------------------------------|------------------------------------------------------------------------------------------|
| 1   | 2013 | January 18-23                | Local + Northwest (long distance)                                                        |
| 2   |      | January 26-31                | Local + South (short distance) + Southeast (short distance)                              |
| 3   |      | February 23-28               | South (short distance) + Northwest (long distance)                                       |
| 4   |      | March 5-8                    | South (short distance)                                                                   |
| 5   |      | March 15-18                  | Local + South (short distance) + Northwest (long distance)                               |
| 6   |      | April 2-4                    | Local + South (medium distance) + Northwest (medium distance)                            |
| 7   |      | May 6-8                      | South (short distance) + South (medium distance)                                         |
| 8   |      | July 18-20                   | South (short distance)                                                                   |
| 9   |      | September 17-19              | Local                                                                                    |
| 10  |      | September 27 to<br>October 1 | South (short distance)                                                                   |
| 11  |      | October 4-7                  | South (short distance)                                                                   |
| 12  |      | October 30 to<br>November 2  | Local + South (short distance) + South (medium distance)                                 |
| 13  |      | November 21-24               | Local + Northwest (short distance) + Northwest (medium distance)                         |
| 14  |      | December 1-4                 | Local + Northwest (short distance) + North (short distance)                              |
| 15  |      | December 6-8                 | Local + South (short distance) + Southeast (short distance)                              |
| 16  |      | December 21-25               | Local + South (short distance)                                                           |
| 17  | 2014 | January 5-7                  | Local + South (short distance)                                                           |
| 18  |      | January 13-19                | Local + South (short distance)                                                           |
| 19  |      | January 22-24                | South (short distance)                                                                   |
| 20  |      | February 11-16               | Local + South (short distance) + South (medium distance) +<br>Southeast (short distance) |
| 21  |      | February 20-26               | South (short distance) + Southeast (short distance)                                      |
| 22  |      | March 8-11                   | Local + South (short distance)                                                           |
| 23  |      | March 23-28                  | South (medium distance)                                                                  |
| 24  |      | March 31 to April 2          | Local + South (short distance) + South (medium distance)                                 |
| 25  |      | April 7-9                    | South (medium distance)                                                                  |
| 26  |      | April 12-14                  | South (short distance) + South (medium distance)                                         |
| 27  |      | April 23-25                  | South (short distance) + South (medium distance)                                         |
| 28  |      | October 7-11                 | South (short distance) + South (medium distance) + South (long distance)                 |
| 29  |      | October 17-20                | South (short distance) + South (medium distance) + South (long distance)                 |
| 30  |      | October 23-25                | Local + South (short distance) + South (medium distance) +<br>Northwest (long distance)  |
| 31  |      | October 29-31                | South (short distance) + Southeast (short distance)                                      |
| 32  |      | November 19-21               | Local + South (short distance) + South (medium distance) +<br>Northwest (long distance)  |
| 33  |      | December 26-29               | Local + South (medium distance) + West (medium distance) +<br>Northwest (long distance)  |
| 34  | 2015 | January 3-5                  | Local + West (long distance)                                                             |

|    |                              |                                                     |
|----|------------------------------|-----------------------------------------------------|
| 35 | January 8-10                 | Local + Northwest (long distance)                   |
| 36 | January 14-16                | South (medium distance) + South (long distance)     |
| 37 | January 22-26                | Local + West (long distance)                        |
| 38 | February 19-21               | North (medium distance)、 South (long distance)      |
| 39 | March 6-8                    | Local + West (long distance)                        |
| 40 | March 15-17                  | Local + Northwest (long distance)                   |
| 41 | April 9-11                   | Local                                               |
| 42 | May 26-28                    | Local + South (medium distance)                     |
| 43 | October 14-17                | South (medium distance) + Northwest (long distance) |
| 44 | November 10-15               | Local + South (medium distance)                     |
| 45 | November 27 to<br>December 1 | South (medium distance) + Northwest (long distance) |
| 46 | December 7-10                | Local                                               |
| 47 | December 21-26               | Northwest (long distance)                           |

---

1

2

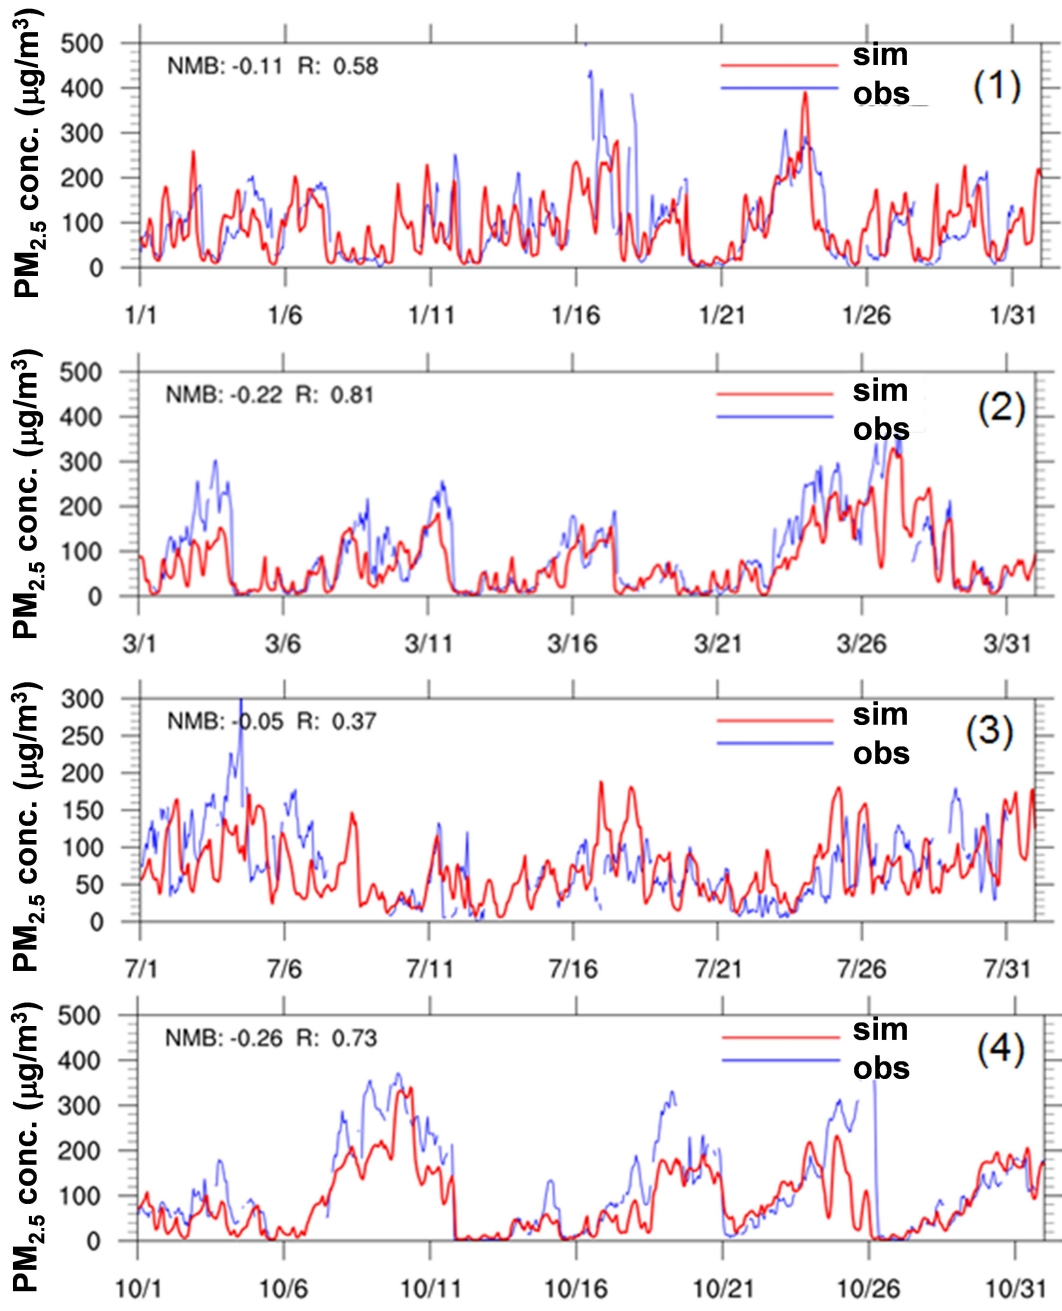

1  
2  
3  
4  
5  
6

Figure S1. Comparison of simulated and observed PM<sub>2.5</sub> concentrations at the Dongsi site in Beijing in (1) January, (2) March, (3) July, and (4) October. In July, the simulations and observations are for a nearby Langfang site because the observations at the Dongsi site are missing.

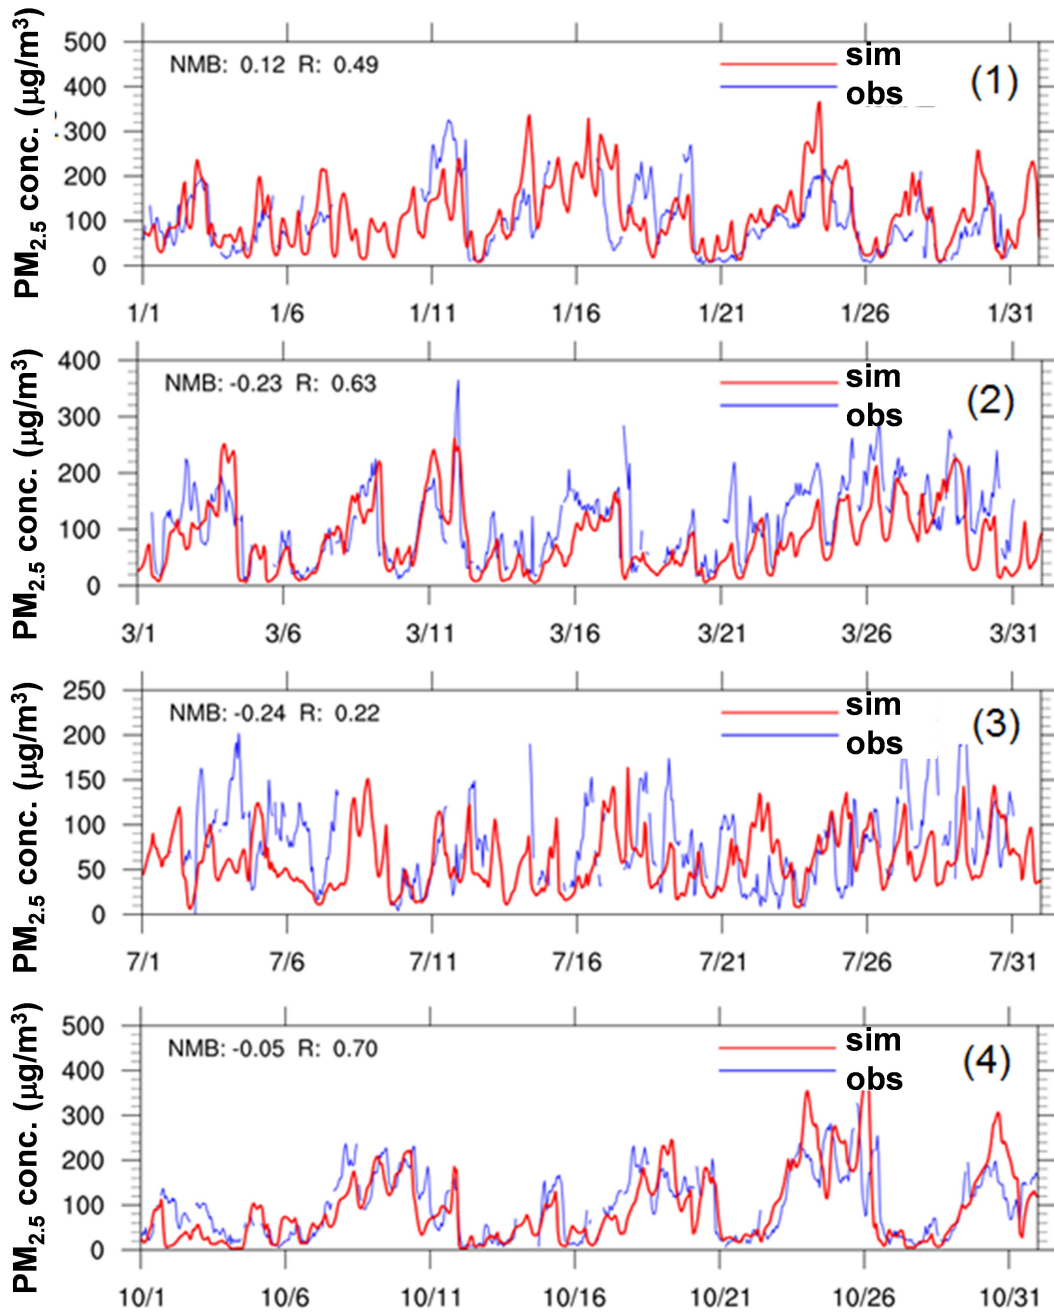

1

2 Figure S2. Comparison of simulated and observed PM<sub>2.5</sub> concentrations at the Tuanbowa site  
 3 in Tianjin in (1) January, (2) March, (3) July, and (4) October.

4

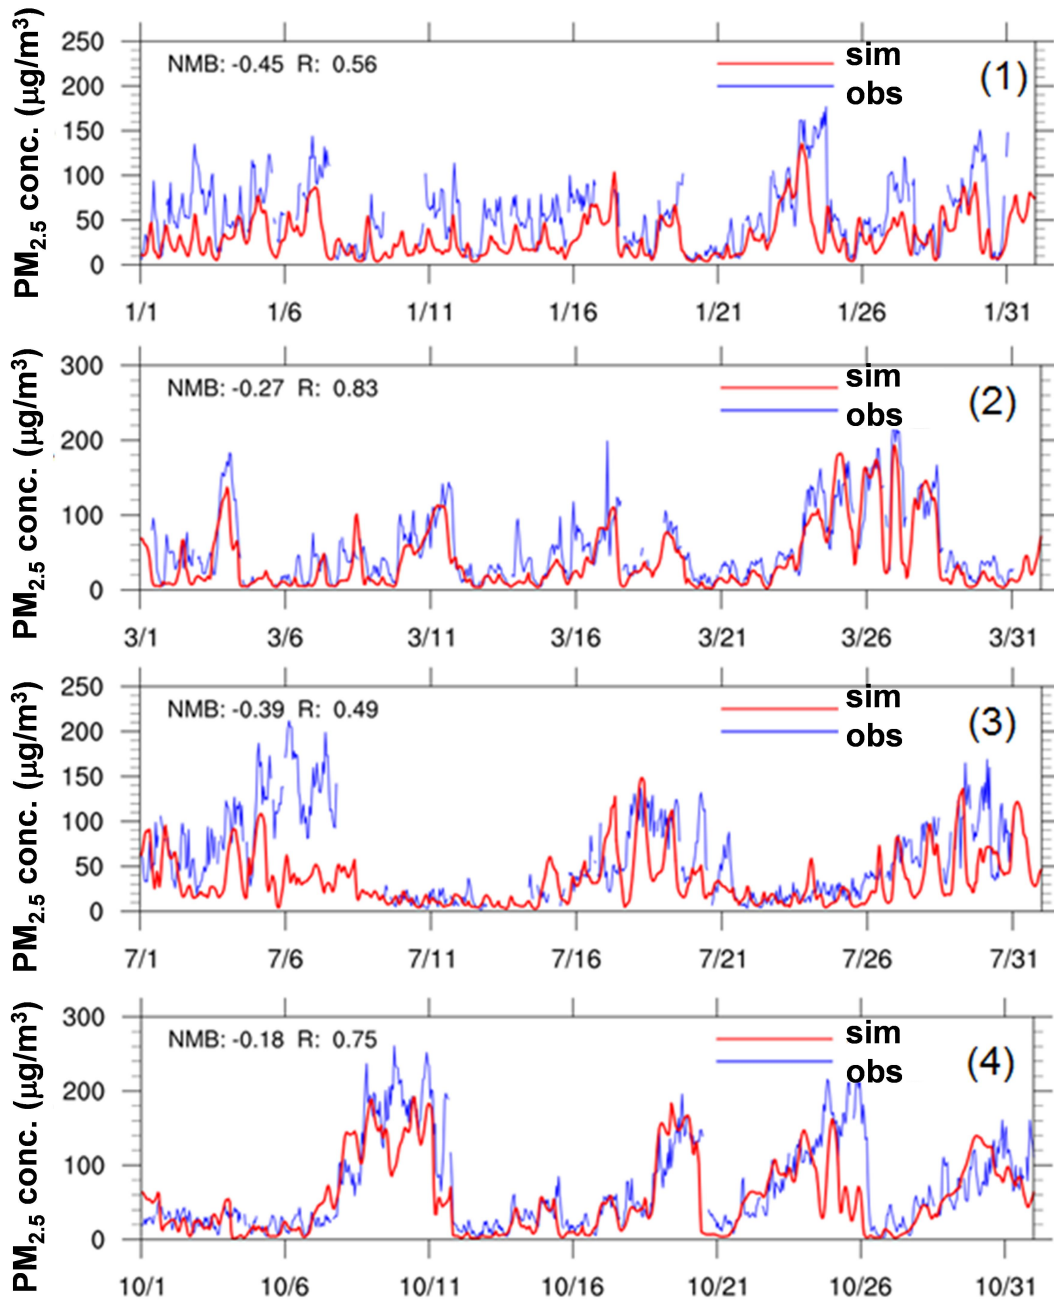

1

2 Figure S3. Comparison of simulated and observed PM<sub>2.5</sub> concentrations at the Chengde site in  
 3 Northern Hebei in (1) January, (2) March, (3) July, and (4) October.

4

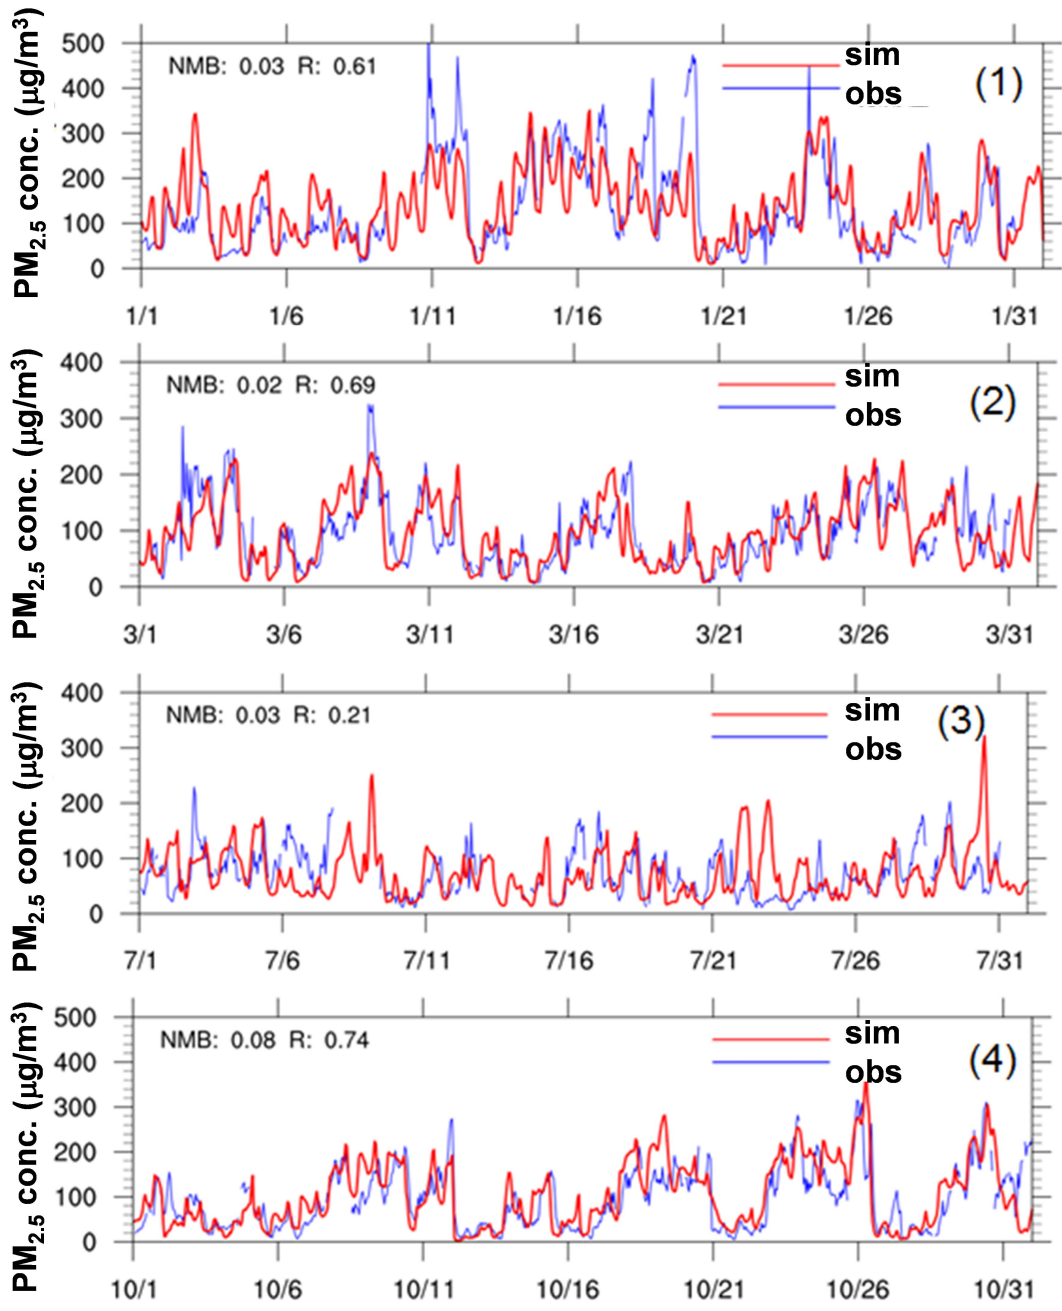

1  
2  
3  
4

Figure S4. Comparison of simulated and observed PM<sub>2.5</sub> concentrations at the Cangzhou site in Eastern Hebei in (1) January, (2) March, (3) July, and (4) October.



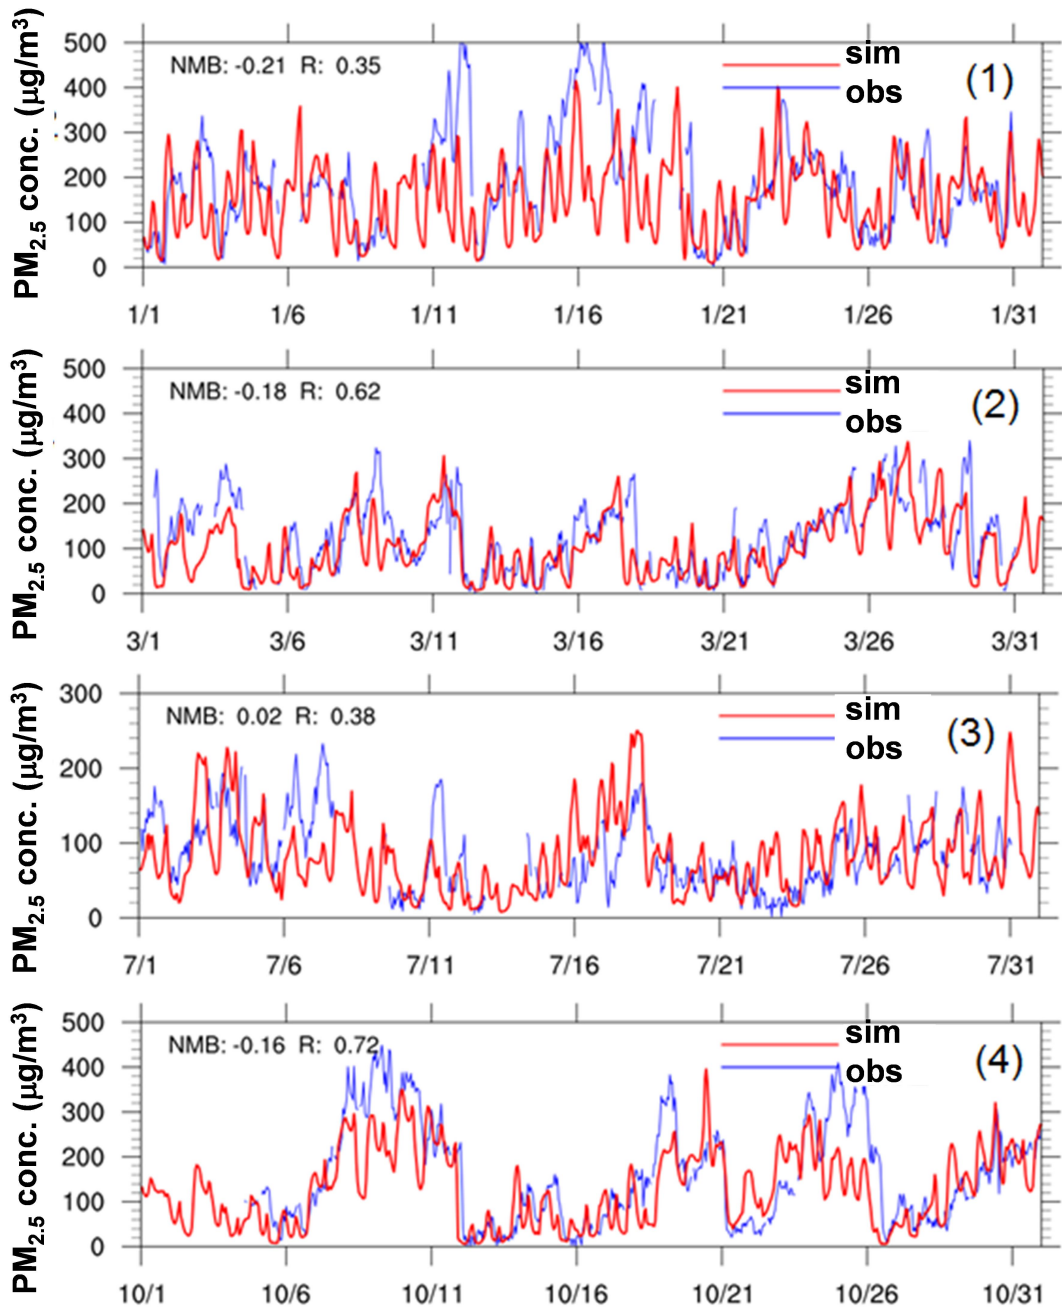

1

2 Figure S5. Comparison of simulated and observed PM<sub>2.5</sub> concentrations at the Baoding site in  
 3 Southern Hebei in (1) January, (2) March, (3) July, and (4) October.

4

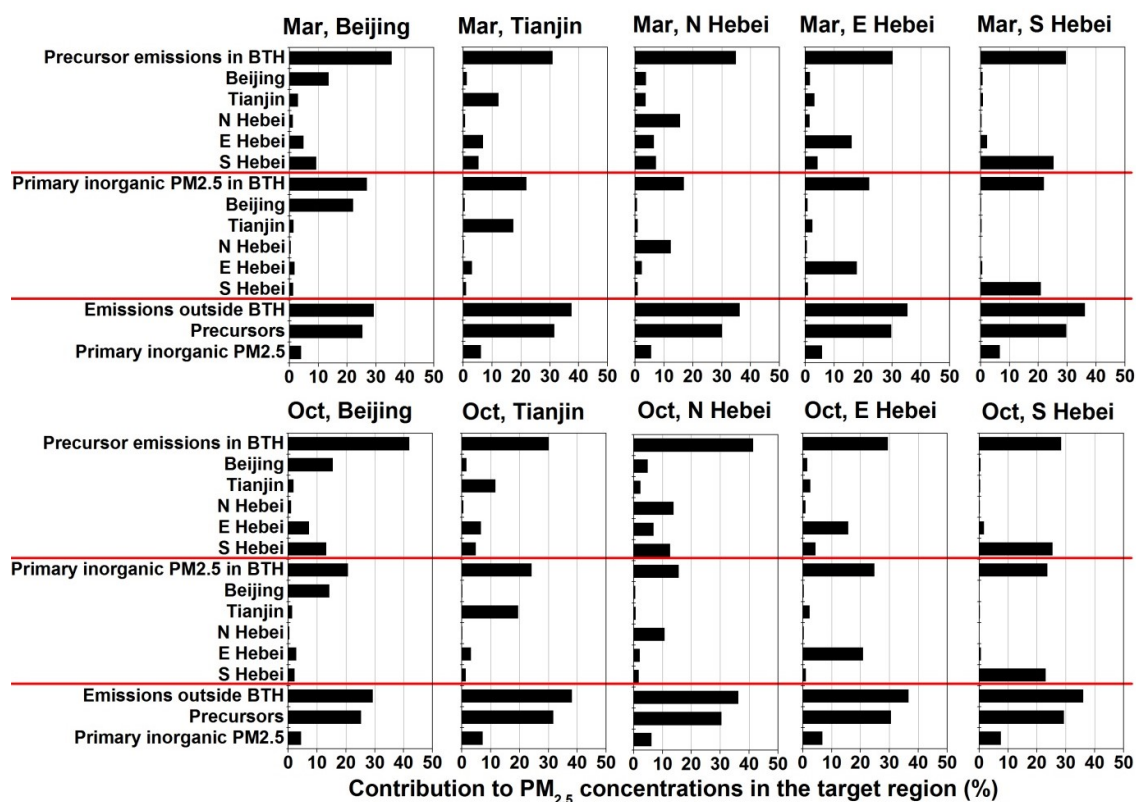

1  
 2 Figure S6. Contributions of precursor (NO<sub>x</sub>, SO<sub>2</sub>, NH<sub>3</sub>, NMVOC, IVOC, and POA) and  
 3 primary inorganic PM<sub>2.5</sub> emissions from individual regions to monthly mean PM<sub>2.5</sub>  
 4 concentrations in March and October. The contributions are quantified by comparing the base  
 5 case with sensitivity scenarios in which emissions from a specific source are reduced by 80%.  
 6 The results for January, July, and the 4-month mean are given in Fig. 6.  
 7

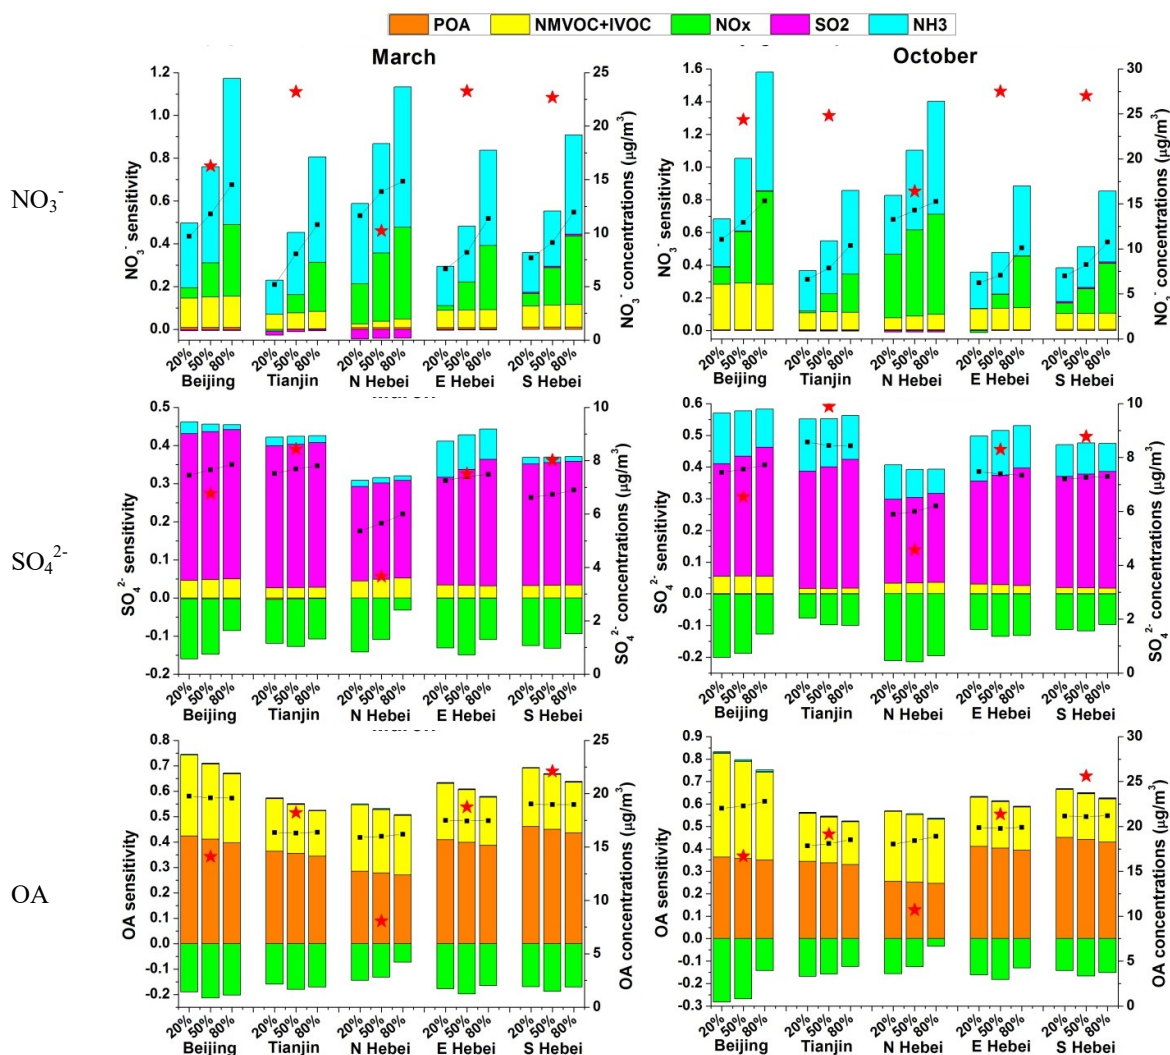

1 Figure S7. Sensitivity of monthly mean  $\text{NO}_3^-$ ,  $\text{SO}_4^{2-}$ , and OA concentrations to stepped  
 2 control of individual air pollutants in March and October. The meanings of X-axis, Y-axis,  
 3 coloured bars, black dotted lines, and red stars are the same as Fig. 4 but for  $\text{NO}_3^-/\text{SO}_4^{2-}/\text{OA}$ .  
 4 The results for January and July are given in Fig. 7.
