# Supplementary material for: A modeling study of the nonlinear response of fine particles to air pollutant emissions in the Beijing-Tianjin-Hebei region
Source: Copernicus journal article supplement (doi:10.5194/acp-2017-428), 2017-05-31
Supplement: Supplementary file [file Response to reviewer 2_20170811.pdf › Response to reviewer 2_20170811.pdf]

Reviewer 2:

We thank the referee for a thoughtful and detailed review of our manuscript. Incorporation of the reviewer's suggestions has led to a much improved manuscript. Below we provide a point-by-point response to the reviewer's comments and summarize the changes that have been incorporated in the revised manuscript.

#### General comments

ERSM has been developed by extending the capabilities of the conventional RSM. Its performance was evaluated. Then, sensitivities of emissions of various primary pollutants and precursors, sectors, and regions on seasonal concentrations of PM<sub>2.5</sub> and their components in BTH region were discussed.

The advantage of the ERSM technique is that it can represent complex non-linear relationships between ambient pollutant concentrations and their precursor emissions. On the other hand, it requires over 1000 simulations. If changes in ambient concentrations in several future scenarios, only several simulations with the brute force method are required. I feel the advantage of the ERSM which overcome tremendous efforts to run simulations over 1000 times is not fully emphasized in this manuscript. In addition, descriptions of limitations of the ERSM technique are scarce. Please add more descriptions on the advantage and disadvantage of the ERSM technique.

**Response:** We appreciate the reviewer's valuable comment. The ERSM technique has several advantages over the traditional brute force method. First, the ERSM technique is able to characterize the nonlinearity in the relationships between ambient concentrations and air pollutant emissions. Second, cost-effective emission controls need to optimize over various pollutants from multiple regions and sectors. Using the brute force method, we need to repeatedly adjust the control option combinations and run the chemical transport model for numerous times. In contrast, the ERSM prediction system, once built, enables real-time prediction of PM<sub>2.5</sub> concentrations for any given control strategy and proves to be an efficient and user-friendly decision making tool. Third, ERSM can be applied to design least-cost control strategy once it is coupled with control cost models/functions that links the emission reductions with economic costs.

The major disadvantage of the ERSM technique is that it requires several hundred or over 1000 emission scenarios, although the scenario number needed to build the response surface for a specific variable number has already been dramatically reduced as compared to the conventional RSM technique. Future studies are needed to further reduce the scenario number and still retain the accuracy of the ERSM technique. Another disadvantage is that the current ERSM technique does not consider the impact of meteorological variations on ambient concentrations. We have detailed the advantages and disadvantages of the ERSM technique in the revised manuscript (Page 4, Line 12-15; Page 8, Line 5-10; Page 21, Line 13-18).

ERSM could provide valuable information to develop effective strategies based on complex non-linear relationships. It means non-linear responses should represent the actual situation in the real atmosphere. I think validation of the responses obtained by ERSM is not enough whereas comparisons of observed concentrations have been made.

Especially, nonlinear responses of NO<sub>x</sub> emissions are critical for policy making. How much NO<sub>x</sub> reduction is necessary to realize positive effects to reduce PM<sub>2.5</sub> concentrations? ERSM could give the answer. However, if the answer is not correct in the real atmosphere, policies may fail to realize PM<sub>2.5</sub> reductions.

Response: We thank the reviewer for this valuable comment. We fully agree that the validation of the responses predicted by ERSM is very important. In response to the comment, we (1) strengthen the validation of the ERSM-predicted responses against CMAQ/2D-VBS simulation, (2) add some discussions about the evaluation of CMAQ/2D-VBS-simulated responses against the actual situation in the real atmosphere, and (3) add some discussions about the impact of NO<sub>x</sub> emission reductions.

(1) In the revised manuscript, we have added a group of scatter plots comparing the PM<sub>2.5</sub> responses (i.e., difference between PM<sub>2.5</sub> concentration in an emission control scenario and that in the base case) predicted by ERSM and independent CMAQ/2D-VBS simulations (second row of Fig. 2, shown below). Moreover, we have calculated the statistics for the comparison of PM<sub>2.5</sub> responses (Table 2, also shown below). Figure 2 and Table 2 illustrate that the ERSM-predicted and CMAQ/2D-VBS-simulated PM<sub>2.5</sub> responses agree well with each other. The correlation coefficients are larger than 0.99, and the normalized mean errors (NMEs) are within 5.6% for all four months. Note that we did not show the normalized errors (NEs) and mean normalized errors (MNEs) for PM<sub>2.5</sub> responses as we did for PM<sub>2.5</sub> concentrations in Table 2. The reason is that the CMAQ/2D-VBS-simulated PM<sub>2.5</sub> responses are very close to zero in several scenarios which are randomly generated, therefore their normalized errors (NEs) and mean normalized errors (MNEs) could be extremely large even if the absolute errors are small, which cannot properly characterize the accuracy of the ERSM technique.

In addition, we compare the 2D-isopleths of PM<sub>2.5</sub> concentrations as a function of continuous changes in precursor emissions (including NO<sub>x</sub> emissions) in a full range (from 0 to 1.2 times), derived from the ERSM and conventional RSM techniques (Fig. 3 in the manuscript). The predictions by conventional RSM can be regarded as proxies for real CMAQ/2D-VBS simulations since it has been extensively demonstrated to have high accuracy and stability in previous studies (Xing et al., 2011; Wang et al., 2011b). For this reason, the comparison between the ERSM and conventional RSM techniques helps to evaluate the accuracy and stability of the ERSM technique. The comparison shows that the shapes of isopleths derived from both prediction systems agree well with each other except for a few cases with very large emission reductions (> 80%), demonstrating the reliability of

1 ERSM in predicting the responses of PM<sub>2.5</sub> concentrations to changes in emissions of  
2 precursors, including NO<sub>x</sub>. Note that all sensitivity scenarios used in the “Results and  
3 discussion” section have emission reductions  $\leq 80\%$ , therefore, the results and conclusions of  
4 this study are not affected by the relatively large errors at very large emission reductions.

5 (2) The preceding discussions demonstrate the agreement between ERSM-predicted and  
6 CMAQ/2D-VBS-simulated PM<sub>2.5</sub> responses. However, evaluating the PM<sub>2.5</sub> responses  
7 simulated by chemical transport models against the actual situation in the real atmosphere  
8 represents a major challenge in atmospheric modeling studies, because it is extremely difficult  
9 to artificially perturb emissions in the real atmosphere. Some special events when temporary  
10 control measures are implemented, such as the Beijing Olympic Games and the APEC  
11 conference, might provide opportunities to evaluate the simulated responses. However, such  
12 effects of temporary emission reductions could be confounded by meteorological variations.  
13 We fully recognize the importance to make sure that the simulated responses represent the  
14 situation in real atmosphere, but such evaluations are very complicated and appear to be  
15 beyond the purview of the present study. We have highlighted this issue as a major limitation  
16 of the present study (Page 21, Line 8-12), which requires further investigations.

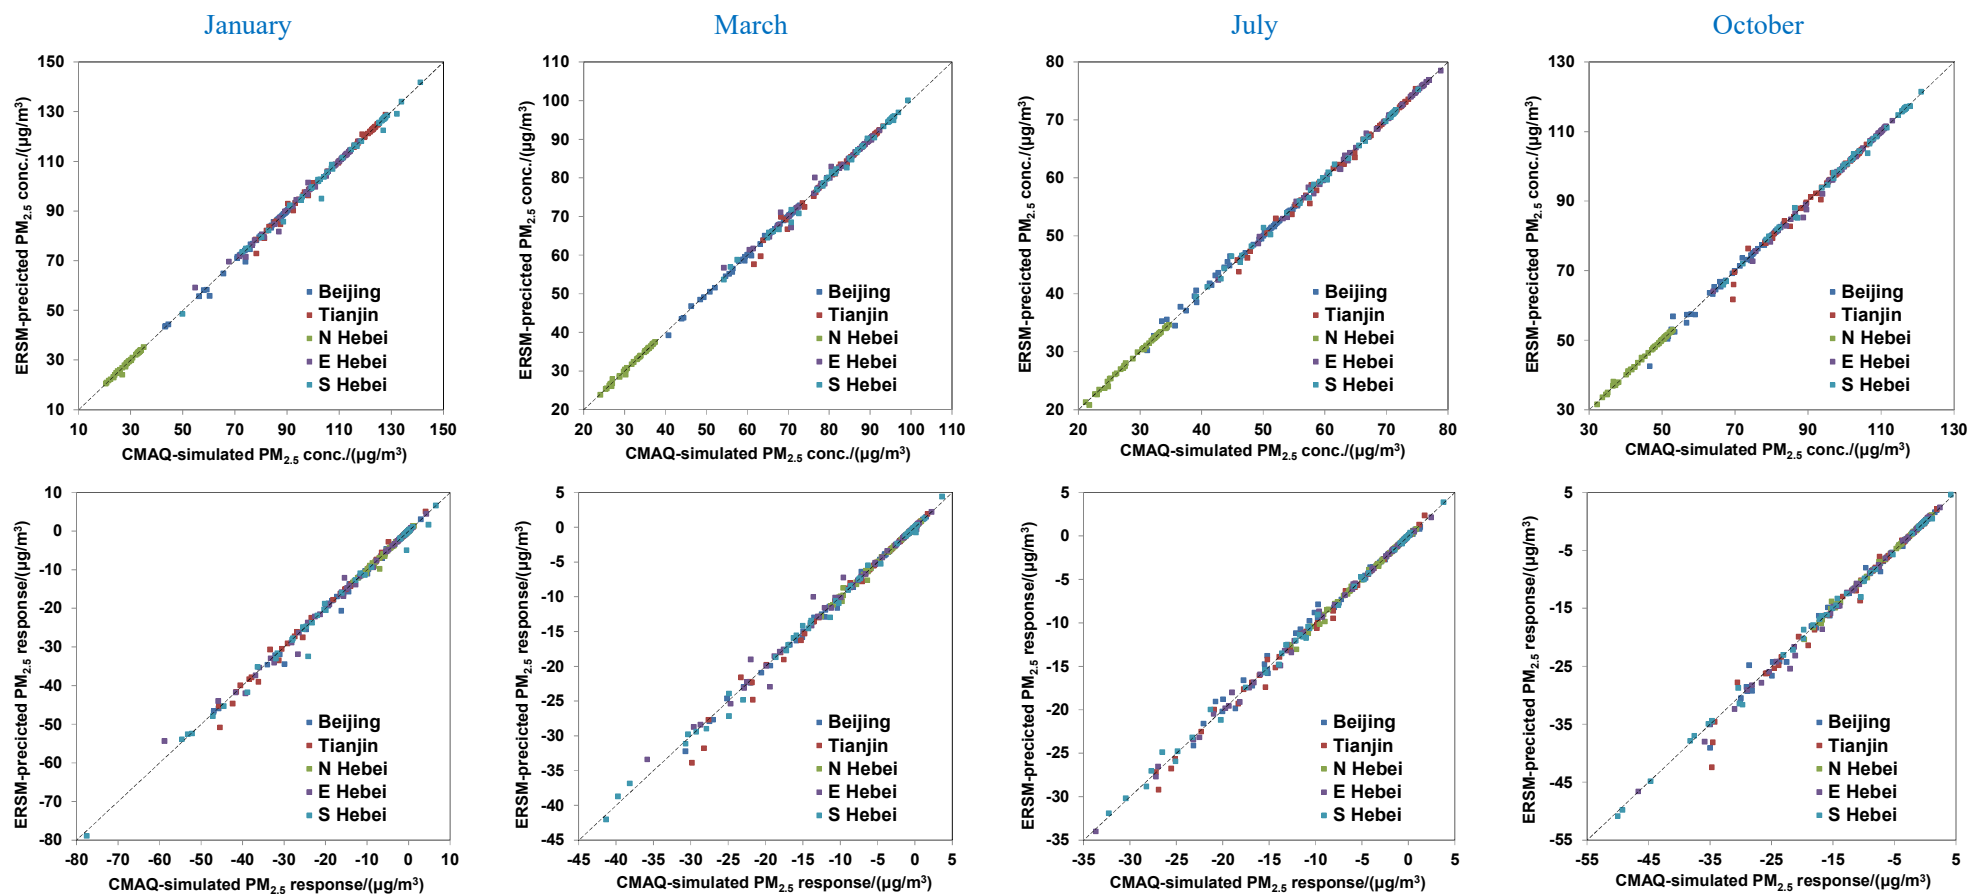

Figure 2. Comparison of PM<sub>2.5</sub> concentrations (top row) and PM<sub>2.5</sub> responses (bottom row) predicted by the ERSM technique with out-of-sample CMAQ/2D-VBS simulations. The dashed line is the one-to-one line indicating perfect agreement.

Table 2. Comparison between ERSM-predicted and CMAQ/2D-VBS-simulated PM<sub>2.5</sub> concentrations for 54 out-of-sample scenarios.

| Month | Variable                        | Statistical index         | Beijing | Tianjin | Northern Hebei | Eastern Hebei | Southern Hebei |
|-------|---------------------------------|---------------------------|---------|---------|----------------|---------------|----------------|
| Jan   | PM <sub>2.5</sub> concentration | R                         | 0.998   | 0.998   | 0.995          | 0.997         | 0.997          |
|       |                                 | MNE (%)                   | 0.52    | 0.55    | 0.64           | 0.67          | 0.60           |
|       |                                 | Maximum NE (%)            | 7.56    | 6.98    | 10.67          | 8.01          | 8.03           |
|       |                                 | 95% percentile of NEs (%) | 1.61    | 2.86    | 2.92           | 3.46          | 3.02           |
|       |                                 | NME (%)                   | 0.44    | 0.46    | 0.57           | 0.53          | 0.53           |
|       | PM <sub>2.5</sub> response      | R                         | 0.998   | 0.998   | 0.995          | 0.997         | 0.997          |
|       |                                 | NME (%)                   | 3.36    | 3.48    | 4.25           | 4.00          | 3.88           |
| Mar   | PM <sub>2.5</sub> concentration | R                         | 0.999   | 0.996   | 0.998          | 0.995         | 0.999          |
|       |                                 | MNE (%)                   | 0.37    | 0.54    | 0.39           | 0.57          | 0.49           |
|       |                                 | Maximum NE (%)            | 3.75    | 6.58    | 4.30           | 5.04          | 3.22           |
|       |                                 | 95% percentile of NEs (%) | 1.53    | 3.15    | 2.03           | 4.35          | 2.03           |
|       |                                 | NME (%)                   | 0.31    | 0.45    | 0.34           | 0.49          | 0.42           |
|       | PM <sub>2.5</sub> response      | R                         | 0.999   | 0.996   | 0.998          | 0.995         | 0.999          |
|       |                                 | NME (%)                   | 2.38    | 4.32    | 2.70           | 4.55          | 3.59           |
| Jul   | PM <sub>2.5</sub> concentration | R                         | 0.997   | 0.998   | 0.998          | 0.999         | 0.999          |
|       |                                 | MNE (%)                   | 0.94    | 0.54    | 0.46           | 0.37          | 0.47           |
|       |                                 | Maximum NE (%)            | 5.05    | 5.02    | 4.65           | 1.83          | 3.62           |
|       |                                 | 95% percentile of NEs (%) | 3.47    | 2.33    | 2.17           | 1.49          | 1.87           |
|       |                                 | NME (%)                   | 0.80    | 0.47    | 0.41           | 0.33          | 0.39           |
|       | PM <sub>2.5</sub> response      | R                         | 0.997   | 0.998   | 0.998          | 0.999         | 0.999          |
|       |                                 | NME (%)                   | 4.97    | 3.71    | 2.80           | 2.58          | 2.78           |
| Oct   | PM <sub>2.5</sub> concentration | R                         | 0.996   | 0.994   | 0.999          | 0.999         | 0.999          |
|       |                                 | MNE (%)                   | 0.83    | 0.70    | 0.36           | 0.39          | 0.36           |
|       |                                 | Maximum NE (%)            | 8.90    | 11.19   | 3.79           | 3.90          | 2.46           |
|       |                                 | 95% percentile of NEs (%) | 3.04    | 3.50    | 1.44           | 2.10          | 1.64           |
|       |                                 | NME (%)                   | 0.67    | 0.58    | 0.30           | 0.35          | 0.32           |
|       | PM <sub>2.5</sub> response      | R                         | 0.996   | 0.994   | 0.999          | 0.999         | 0.999          |
|       |                                 | NME (%)                   | 4.51    | 5.64    | 2.20           | 3.29          | 2.79           |

(3) Next we discuss the impact of NO<sub>x</sub> emission reductions. If only the NO<sub>x</sub> emissions within the BTH region are controlled, our simulation results (Fig. 4) reveal that a very large reduction ratio (about 80%) is required to realize a reduction in annual PM<sub>2.5</sub> concentrations in most areas. However, the effects could be distinctly different if NO<sub>x</sub> emissions outside the BTH region are jointly reduced. Our previous studies using the CMAQ model (Zhao et al., 2013b; Wang et al., 2010; Wang et al., 2011b) have shown that uniform reductions in NO<sub>x</sub> emissions in the whole China by 23-50% result in considerable annual PM<sub>2.5</sub> reduction over the BTH region. This is because NO<sub>x</sub> emission reductions in upwind regions are more likely to result in a net

PM<sub>2.5</sub> decrease compared with local emission reductions, since the photochemistry typically changes from a NMVOC-limited regime in local urban areas at surface to a NO<sub>x</sub>-limited regime in downwind areas or at upper levels (Xing et al., 2011). The simulation results in this paper also support the above-mentioned pattern and mechanism to some extent: even a 20% NO<sub>x</sub> emission reduction in BTH can lead to PM<sub>2.5</sub> decrease in Northern Hebei (see Fig. 4 in the manuscript), because, as the northernmost region in BTH, it is significantly affected by emissions in other regions within BTH. In view of the discussions above, we suggest that NO<sub>x</sub> emissions should be substantially reduced in the long run in both the BTH region and the other parts of China.

Finally, we note that NO<sub>x</sub> emissions were recently found to oxidize SO<sub>2</sub> in aerosol water, leading to additional PM<sub>2.5</sub> formation (Cheng et al., 2016; Wang et al., 2016), which is a missing chemical process in most chemical transport models. Incorporation of this process in the model may affect the simulated response of PM<sub>2.5</sub> to NO<sub>x</sub> emissions. More studies are still needed to further investigate the effects of NO<sub>x</sub> emissions on PM<sub>2.5</sub> concentrations. We have added the discussions above in the revised manuscript (from Page 10, Line 29 to Page 11, Line 3; Page 11, Line 10-32; Page 21, Line 18-23; from Page 13, Line 21 to Page 14, Line 6).

Which components are included in inorganic PM<sub>2.5</sub>? Is EC included? How about other components like metals? It looks strange that primary organic aerosol (POA) is included as a precursor probably due to treatment in VBS. Please give precise definitions of these words.

Response: We thank the reviewer for this valuable comment. Primary inorganic PM<sub>2.5</sub> is defined as all chemical components of primary PM<sub>2.5</sub> other than POA. By definition, it includes EC, metals, as well as many other constituents such as sulfate and nitrate directly emitted from sources. POA is treated as a precursor because it undergoes chemical reactions and produces SOA in the CMAQ/2D-VBS model, while primary inorganic PM<sub>2.5</sub> is chemically inert. In the revised manuscript, we have defined the “primary inorganic PM<sub>2.5</sub>” clearly and added the reasons to treat POA as a precursor (from Page 8, Line 28 to Page 9, Line 1).

What do “discrepant temporary control strategies” mean? How are they possible? I understand major sources are different in each heavy air pollution episode. However, it could be possible to implement different temporary control strategies for each episode only if it could be forecasted. Can ERSIM be used to forecast major sources in coming heavy air pollution episodes? I think differences of major sources in each episode suggest to implement strategies which control emissions of all the sources which could be major in various episodes.

Response: “Discrepant temporary control strategies” mean that the temporary control strategies should focus on different emission sources during different heavy pollution episodes. To make it clear, we have revised this sentence as follows:

The source contribution features for various types of heavy-pollution episodes are distinctly different from each other, and from the monthly mean results, illustrating that control strategies should be differentiated based on the major contributing sources during different types of episodes. (Page 2, Line 21-24)

In the present study, we only studied the source contribution features of three typical episodes. These results are not yet sufficient to guide the development of temporary control strategies for all heavy-pollution episodes, because the conclusions drawn from the three episodes may not be generalized to pollution types. In future studies, we need to simulate more episodes to improve their classification and to comprehensively understand the source contribution features of each pollution type. For a coming heavy-pollution episode, we can predict its pollution type using an air quality forecasting model, and subsequently formulate the temporary control strategies based on the source contribution features of this specific pollution type. We have described the method to develop episode-specific control strategies using ERSM in the revised manuscript (Page 19, Line 14-23).

#### Specific comments

Page 3, Line 8 How much are 2012 levels?

Response: It was not until January 2013 that the Ministry of Environment of China began to report PM<sub>2.5</sub> concentrations to the public. In 2012, the PM<sub>2.5</sub> concentrations were only available for limited sites such as the United States Embassy in Beijing, where the annual mean concentration was 90.7 µg/m<sup>3</sup>. The average PM<sub>2.5</sub> concentrations over the BTH region were not publicly available.

Page 3, Line 22 The sentence here says “CTMs are the only feasible tools for evaluating the response of PM<sub>2.5</sub> concentrations to emission changes”. However, the sentences around the line 14 describe that embedding chemical tracers in chemical transport models (CTMs) cannot represent non-linear response. They may confuse some readers who are not familiar to CTMs.

Response: We agree with the reviewer and have deleted the former sentence, which is redundant.

Page 3, Line 26 “Sensitivities” are more appropriate than “contributions” in the context here.

Response: We agree with the reviewer and have modified this sentence as follows in the revised manuscript (Page 3, Line 25-31).

A number of studies have utilized the “Brute force” method to quantify the sensitivities of PM<sub>2.5</sub> concentrations over the BTH region to emissions from different spatial regions or different economic sectors, either on a seasonal basis or during a specific heavy-pollution episode.

Page 4, Line 5 How inadequate?

Response: The previous studies reviewed here applied the Decoupled Direct Method or Adjoint Analysis approach, which are used to calculate first-order sensitivities. However, characterizing the nonlinearity in the responses of PM<sub>2.5</sub> concentrations to emissions requires the calculation of second- or higher-order sensitivities. Therefore, we state that the previous studies have inadequately captured the nonlinearity in the responses of PM<sub>2.5</sub> concentrations to emissions. We have added the explanations to the revised manuscript (Page 4, Line 5-8).

Page 5, Line 7 How were emissions of IVOC provided?

Response: Following our previous study (Zhao et al., 2016), we assume IVOC emissions to be 30 times, 4.5 times, 1.5 times, and 3.0 times the POA emissions from gasoline vehicles, diesel vehicles, biomass burning, and other emission sources, respectively, which is based on a series of laboratory measurements (Gordon et al., 2014b; Gordon et al., 2014a; Hennigan et al., 2011; Jathar et al., 2014). We have added these descriptions in the revised manuscript (from Page 6, Line 32 to Page 7, Line 4).

Page 5, Line 8 OA and SOA are listed parallelly, but SOA is included in OA.

Response: We have revised the sentence as follows (Page 5, Line 6-11).

Compared with the default CMAQ, the CMAQ/2D-VBS model explicitly simulates aging of secondary organic aerosol (SOA) formed from non-methane volatile organic compounds (NMVOC), aging of primary organic aerosol (POA), and photo-oxidation of intermediate-volatility organic compounds (IVOC), thereby significantly improving the simulation results of organic aerosol (OA), particularly SOA.

Page 5, Line 30 I think NCEP final analysis data is not reanalysis data. Is it not used for grid nudging?

Response: We have revised the descriptions about the first guess field and nudging as follows in order to make them more accurate.



The National Center for Environmental Prediction (NCEP)'s FNL (Final) Operational Global Analysis data (ds083.2) at  $1.0^\circ \times 1.0^\circ$  and 6-h resolution are used to generate the first guess field. The NCEP's Automated Data Processing (ADP) data (ds351.0 and ds461.0) are used in objective analysis (i.e., grid nudging). (from Page 5, Line 31 to Page 6, Line 2 in the revised manuscript)

Page 6, Line 4 I think terrain data is not from MODIS.

Response: We apologize for the mistake and have corrected this sentence as follows:

The land cover type data are obtained from the Moderate resolution Imaging Spectroradiometer (MODIS). (Page 6, Line 7-8 in the revised manuscript)

Page 6, Line 25 How about open biomass burning emissions?

Response: In both the BTH and national emission inventories, the emissions from open burning of agricultural residue are calculated using crop yields, straw to grain ratio, fraction of biomass burned in the open field, and emission factors (Fu et al., 2013; Zhao et al., 2013a; Wang and Zhang, 2008). We do not include the emissions from forest and grassland fires, which typically account for less than 5% of the total biomass burning emissions over the BTH region (Qin and Xie, 2011) and are not the focus of the present study. We have added the preceding descriptions in the revised manuscript (Page 6, Line 23-28).

Page 9, Line 21 How about the performance of  $\text{SO}_4^{2-}$ ,  $\text{NO}_3^-$ , and OA?

Response: This manuscript focuses on the response of  $\text{PM}_{2.5}$  concentrations to air pollutant emissions, and the responses of  $\text{SO}_4^{2-}$ ,  $\text{NO}_3^-$ , and OA are examined just to better understand the responses of  $\text{PM}_{2.5}$ . For this reason, the response surfaces of  $\text{SO}_4^{2-}$ ,  $\text{NO}_3^-$ , and OA are only built using the conventional RSM technique to map their concentrations versus emissions of five  $\text{PM}_{2.5}$  precursors, i.e.,  $\text{NO}_x$ ,  $\text{SO}_2$ ,  $\text{NH}_3$ , NMVOC+IVOC, and POA. Since conventional RSM has been adequately demonstrated to have high accuracy and stability (Xing et al., 2011; Wang et al., 2011b), we did not include its validation in the present paper. We have clarified this point in the revised manuscript (Page 8, Line 18-22; Page 9, Line 27-29).

Page 10, Line 8 Why are only NMEs shown? How about R and MNEs? I suppose it is more important for RSM to see responses than to reproduce concentrations.

Response: We fully agree with the reviewer that the evaluation of PM<sub>2.5</sub> responses is very important. Since the CMAQ/2D-VBS-simulated PM<sub>2.5</sub> responses are very close to zero in several out-of-sample scenarios which are generated randomly, their normalized errors (NEs) and mean normalized errors (MNEs) could be extremely large even if the absolute errors are small, which cannot properly characterize the accuracy of the ERSM technique. For example, for the 11<sup>th</sup> case used in out-of-sample validation, the CMAQ/2D-VBS-simulated PM<sub>2.5</sub> response in January is 0.0003 µg/m<sup>3</sup> while the ERSM-predicted value is 0.03 µg/m<sup>3</sup>. While the ERSM-predicted and CMAQ/2D-VBS-simulated values are actually quite close, the NE is as large as about 10000%. Therefore, we argue that NE and MNE are not suitable for evaluating ERSM's performance on PM<sub>2.5</sub> responses. With respect to R, the values for PM<sub>2.5</sub> responses are exactly the same as those for PM<sub>2.5</sub> concentrations, so we did not include R for PM<sub>2.5</sub> responses in the original manuscript. In the revised manuscript, we have added R for PM<sub>2.5</sub> responses to make the results more clear (Table 2), and also explained the reasons for excluding NE and MNE (from Page 10, Line 30 to Page 11, Line 1).

Page 10, Line 15 I do not understand meaning of comparisons between ERSM and conventional RSM. Why these two model could produce different results? Which should be correct? The sentence in the line 31 says that the ERSM predictions are definitely subject to numerical errors, but I do not know why “definitely”. Although there are descriptions of ERSM in the first paragraph of the section 2.2, the advantages and disadvantages of ERSM against conventional RSM should be clearly explained.

Response: We thank the reviewer for this valuable comment. While the conventional RSM has been demonstrated to have very high accuracy and stability, the number of emission scenarios required to build it depends on the variable number via an equation of fourth or higher order. Therefore, the required scenario number would be tens of thousands for over 15 variables and even hundreds of thousands for over 25 variables, which is computationally impossible for most three-dimensional CTMs and proves to be a major limitation for the conventional RSM technique. The ERSM technique substantially reduces the number of scenarios needed to build the response surface by introducing several additional assumptions with respect to the inter-regional transport of air pollutants (see Section 2.2), which extends its applicability to a much larger number of regions, pollutants, and sectors with an acceptable computational burden. Meanwhile, the additional assumptions in the ERSM techniques might affect its accuracy. Therefore, the conventional RSM technique is theoretically more close to the predictions of CMAQ/2D-VBS, and its accuracy has been extensively evaluated in previous studies (Xing et al., 2011; Wang et al., 2011b). For this reason, the comparison between the ERSM and conventional RSM techniques helps to evaluate the accuracy and stability of the ERSM technique.

The statement that “ERSM predictions are definitely subject to numerical errors” means that ERSM, like all models, cannot exactly agree with the true values. We have deleted this redundant sentence in the revised manuscript to avoid misunderstanding.

As described above, the major advantage of ERSM over conventional RSM is that it is applicable to a much larger number of regions, pollutants, and sectors with an acceptable computational burden. For example, in the present study, the conventional RSM is applied to only 5 control variables, i.e., the total emissions of five PM<sub>2.5</sub> precursors. The ERSM technique, however, is applied to 55 control variables including the emissions of multiple pollutants from different regions and sectors. The major disadvantage of ERSM is that it might be subject to larger errors than conventional RSM due to the additional assumptions in the treatment of inter-regional transport.

We have added the descriptions above in the revised manuscript (Page 4, Line 19-27; Page 11, Line 10-17).

Page 11, Line 5 What is the advantage of ERSM against conventional RSM in the results shown in Figure 4? I think the sector-wise results shown in the right figure cannot be obtained by conventional RSM. Is that correct? Please described what is newly obtained by using ERSM.

Response: It is correct. The sector-wise results shown in Fig. 4 (right panel) and Fig. 5, as well as the regional contributions shown in Fig. 6 can only be obtained from ERSM. We have clarified this in the revised manuscript (Page 12, Line 15-17).

Page 11, Line 16 It looks strange to represent primary inorganic PM<sub>2.5</sub> as “single pollutant” because it is a mixture of various components in fact.

Response: We have modified this sentence as follows:

While primary inorganic PM<sub>2.5</sub> makes the largest contribution to PM<sub>2.5</sub> concentrations among all air pollutants, the total contributions of all precursors (NO<sub>x</sub>, SO<sub>2</sub>, NH<sub>3</sub>, NMVOC, IVOC, and POA), which range between 31% and 48%, exceed that of primary inorganic PM<sub>2.5</sub> (24-36%). (Page 12, Line 25-28)

Page 11, Line 29 What is the reasons of small sensitivities of SO<sub>2</sub> emissions on PM<sub>2.5</sub>?

Response: In the manuscript, we state that the PM<sub>2.5</sub> sensitivity to SO<sub>2</sub> emissions is smaller than that to POA, NMVOC+IVOC, and NH<sub>3</sub>. From 2007 to 2014 (the base year of this study), both SO<sub>2</sub> emissions and SO<sub>4</sub><sup>2-</sup> concentrations in PM<sub>2.5</sub> have been continuously decreasing due to

effective control policies (Wang et al., 2017). As a result, the simulated concentrations of  $\text{SO}_4^{2-}$  are much lower than those of OA (see Fig. 7 and Fig. S7 in the manuscript), which explains the smaller sensitivity of  $\text{PM}_{2.5}$  to  $\text{SO}_2$  than those to POA and NMVOC+IVOC. The reason why  $\text{PM}_{2.5}$  is less sensitive to  $\text{SO}_2$  emission reductions than that to  $\text{NH}_3$  is that the reduction in  $\text{NH}_3$  emissions affects both the concentrations of  $\text{NO}_3^-$  and  $\text{SO}_4^{2-}$ , while  $\text{SO}_2$  emission reductions mainly lead to decrease in  $\text{SO}_4^{2-}$  concentrations. Additionally, the small sensitivities to  $\text{SO}_2$  emissions may also be partly attributed to the underestimation of  $\text{SO}_4^{2-}$  in the CMAQ/2D-VBS model, which is a common problem of many chemical transport models (Wang et al., 2011a; Gao et al., 2014; Wang et al., 2013). While the reasons for underestimation are yet to be resolved, possible causes could be the lack of some chemical formation pathways in the modeling system, such as  $\text{SO}_2$  heterogeneous reactions on the dust surface and the oxidation of  $\text{SO}_2$  by  $\text{NO}_2$  in aerosol water (Wang et al., 2013; Fu et al., 2016; Cheng et al., 2016). We have added the discussions in the revised manuscript (Page 13, Line 8-11; Page 14, Line 2-6).

Page 11, Line 31 Nonlinear sensitivities of NO<sub>x</sub> emissions and their changes from negative to positive are described from here. I also agree that this is very important phenomena to consider effective emission controls. However, on the other hand, the descriptions in the page 10 treat such a nonlinear change in sensitivities and differences with conventional RSM as just a rare case involving large unrealistic reduction of NO<sub>x</sub> emissions. I do not agree that. Even if large NO<sub>x</sub> reduction is required, the performance of ERSM to represent such a nonlinear change should be carefully evaluated.

Response: We agree with the reviewer that we should carefully evaluate the performance of ERSM over a full emission range, including at very large NO<sub>x</sub> emission reductions. The reason why we stated that the relatively large errors at very low emission ratios did not affect our conclusion is that all sensitivity scenarios used in the “Results and discussion” section have emission ratios  $\geq 0.2$ . In response to the reviewer’s comment, we have strengthened the validation of ERSM-predicted  $\text{PM}_{2.5}$  responses against CMAQ/2D-VBS simulations, as described in detail in our response to the reviewer’s second “general comment”. On the other hand, we have added a detailed discussion about the relatively large errors at very low NO<sub>x</sub>/NH<sub>3</sub> emission ratios ( $< 0.2$ ), and highlighted the need for further studies (from Page 11, Line 24 to Page 12, Line 6). The revised text is shown below.

The agreement is very good for the case of VOC+IVOC vs POA, and for the cases of NO<sub>x</sub> vs NH<sub>3</sub> and SO<sub>2</sub> vs NH<sub>3</sub> when the emission ratios for NO<sub>x</sub> and NH<sub>3</sub> are larger than 0.2. Relatively large errors occur at very low NO<sub>x</sub>/NH<sub>3</sub> emission ratios ( $< 0.2$ ) due primarily to an extremely strong nonlinearity. Within these low emission ranges, the ERSM technique can capture the general trends in  $\text{PM}_{2.5}$  concentrations in response to emission changes, but the concentration gradients predicted by ERSM are smaller than those given by conventional RSM. More studies are needed to further improve the performance of ERSM at very low NO<sub>x</sub>/NH<sub>3</sub> emission ratios.

Finally, we note that all sensitivity scenarios used in the “Results and discussion” section have emission ratios  $\geq 0.2$ , therefore, the results and conclusions of this study are not affected by the relatively large errors at very low  $\text{NO}_x/\text{NH}_3$  emission ratios.

Page 12, Line 2 Indeed, the regimes are very important for negative and positive sensitivities of  $\text{NO}_x$  emissions. Therefore, it is quite important to see if ERSM could accurately represent regimes in the real atmosphere. I suppose such validations are scarce.

Response: Although the ERSM-predicted responses of  $\text{PM}_{2.5}$  concentrations have been demonstrated to agree fairly well with CMAQ/2D-VBS simulations, evaluating the simulated  $\text{PM}_{2.5}$  responses (or chemical regimes) against the actual situation in the real atmosphere represents a major challenge in atmospheric modeling studies, because it is extremely difficult to artificially perturb emissions in the real atmosphere. Some special events when temporary control measures are implemented, such as the Beijing Olympic Games and the APEC conference, might provide opportunities to evaluate the simulated responses. However, such effects of temporary emission reductions could be confounded by meteorological variations. We fully recognize the importance to make sure that the simulated responses represent the situation in real atmosphere, but such evaluations are very complicated and appear to be beyond the purview of the present study. We have highlighted this issue as a major limitation of the present study (Page 21, Line 18-23), which requires further investigations.

Page 12, Line 20 Are there any discussions on differences between sensitivities of all pollutants and sectors and sum of sensitivities of individual pollutants and sectors?

Response: The sum of sensitivities of  $\text{PM}_{2.5}$  concentrations to individual pollutant-sector combinations is mostly larger than the sensitivity to all pollutants and sectors, especially under large reduction ratios. This is mainly attributed to the overlapping effect of two precursors (e.g.,  $\text{SO}_2$  and  $\text{NH}_3$ ) involved in the formation of ammonium sulfate and ammonium nitrate. Nevertheless, at small reduction ratios, the sum of individual sensitivities is sometimes smaller, because the negative effects of reducing  $\text{NO}_x$  are mitigated when we simultaneously reduce  $\text{NO}_x$  emissions from multiple sectors as well as emissions of other air pollutants such as NMVOC. We have included these discussions in the revised manuscript (Page 14, Line 11-18).

Page 12, Line 31 What is a reason of higher sensitivities of residential and commercial sources in winter? Heating?

Response: There are two major reasons. On one hand, as the reviewer points out, the emissions from residential and commercial sources are relatively higher in winter due to heating. On the

other hand, the weaker vertical mixing in winter also results in a larger relative contribution of low-level sources including the residential and commercial sector. We have added these explanations in the revised manuscript (Page 14, Line 29-32).

Page 13, Line 8 Are there any specific results indicating the importance of NO<sub>x</sub> emissions outside the BTH region?

Response: The present study focuses on the response of PM<sub>2.5</sub> concentrations to emissions within the BTH region. If only the NO<sub>x</sub> emissions within the BTH region are controlled, a very large reduction ratio of about 80% is required to realize a reduction in annual PM<sub>2.5</sub> concentrations in most areas (Fig. 4). However, our previous studies using the CMAQ model (Zhao et al., 2013b; Wang et al., 2010; Wang et al., 2011b) have shown that uniform reductions in NO<sub>x</sub> emissions in the whole China by 23-50% result in considerable annual PM<sub>2.5</sub> reduction over the BTH region, implying the important role of NO<sub>x</sub> emission reductions outside the BTH region. The reason why NO<sub>x</sub> emission reductions in upwind regions are more likely to result in a net PM<sub>2.5</sub> decrease compared with local emission reductions is that the photochemistry typically changes from a NMVOC-limited regime in local urban areas at surface to a NO<sub>x</sub>-limited regime in downwind areas or at upper levels (Xing et al., 2011). The simulation results in this paper also support the above-mentioned pattern and mechanism to some extent: even a 20% NO<sub>x</sub> emission reduction in BTH can lead to PM<sub>2.5</sub> decrease in Northern Hebei (see Fig. 4 in the manuscript), because, as the northernmost region in BTH, it is significantly affected by emissions in other regions within BTH. We have added these discussions in the revised manuscript (from Page 13, Line 21 to Page 14, Line 2).

Page 14, Line 6 How does seasonal variations of NH<sub>3</sub> emissions look like?

Response: The monthly variations in NH<sub>3</sub> emissions from fertilizer application are based on our previous simulation results (Fu et al., 2015) using an agricultural fertilizer modeling system which couples a regional air quality model (the Community Multi-scale Air Quality model, or CMAQ) and an agro-ecosystem model (the Environmental Policy Integrated Climate model, or EPIC). The monthly variations of livestock farming are obtained from Huang et al. (2012), and those of other emission sources are consistent with the descriptions in our previous paper (Wang et al., 2011a). Overall, the monthly variations in total NH<sub>3</sub> emissions are illustrated in the following figure.

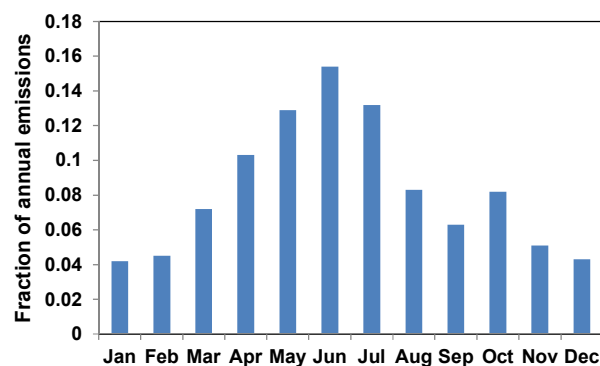

Figure. Monthly variations in total NH<sub>3</sub> emissions over the BTH region.

Page 14, Line 25 Is it confirmed that NO<sub>x</sub> competes with SO<sub>2</sub> for NH<sub>3</sub> in a thermodynamic pathway? I think SO<sub>4</sub><sup>2-</sup> is much more predominantly in aerosol phase than NO<sub>3</sub><sup>-</sup>.

Response: We agree that NH<sub>3</sub> tends to react with SO<sub>2</sub> to form ammonium sulfate. In the present study, the response of SO<sub>4</sub><sup>2-</sup> concentrations to NO<sub>x</sub> emissions can be well explained by only the changes in O<sub>3</sub> and HO<sub>x</sub> concentrations, i.e., the photochemical pathway. Also, the BTH region has been shown to be generally under an NH<sub>3</sub>-rich condition (Wang et al., 2011b). Therefore, the competition between NO<sub>x</sub> and SO<sub>2</sub> for NH<sub>3</sub> does not appear to play a noticeable role in changing SO<sub>4</sub><sup>2-</sup> concentrations. In the revised manuscript, we have deleted the descriptions about the thermodynamic pathway and focused on the photochemical pathway.

Page 15, Line 1 Does this POA include semivolatile components which could condensate only under lower temperature in winter?

Response: We agree with the reviewer that POA includes some semi-volatile components which tend to partition to the particle phase under low temperature in January, which partly explains the higher contributions of POA emissions to OA concentrations in January. Besides, some other factors account for the higher contributions of POA emissions in January and higher contributions of NMVOC+IVOC emissions in July. First, the POA emissions are relatively higher in January due to residential heating, while the NMVOC emissions from solvent use and biogenic sources are higher in July. Second, higher temperature and stronger radiation in July accelerate the formation of SOA from NMVOC+IVOC. We have added the explanations in the revised manuscript (Page 17, Line 3-9).

Page 17, Line 10 I agree more model simulations of more episodes are necessary, but a model can always give results. I believe what is important is to confirm model results are consistent



with actual situations in the real atmosphere. That is quite important to consider effective strategies for heavy air pollutions.

Response: We appreciate the reviewer's valuable comment. We have discussed the validation of PM<sub>2.5</sub> responses predicted by ERSM in detail in our response to the reviewer's second "general comment". In brief, we strengthened the validation of ERSM-predicted responses against CMAQ/2D-VBS simulations and have demonstrated that the ERSM-predicted and CMAQ/2D-VBS-simulated responses of PM<sub>2.5</sub> concentrations to precursor emissions, including NO<sub>x</sub> emissions, agree fairly well with each other. However, evaluating the PM<sub>2.5</sub> responses simulated by CMAQ/2D-VBS against the actual situation in the real atmosphere represents a major challenge in atmospheric modeling studies, because it is extremely difficult to artificially perturb emissions in the real atmosphere. We have recognized this issue as a major limitation of the present study, which requires further investigations.

Page 18, Line 18 I am wondering if NMVOC and IVOC should be discussed together to implement any strategies because their sources and their effects on PM<sub>2.5</sub> and ozone could be different.

Response: We fully agree with the reviewer that the impact of NMVOC and IVOC emissions should ideally be quantified separately considering the differences in their sources and effects on SOA and O<sub>3</sub>. In the present study, they are lumped together to reduce the number of control variables in view of the fact that they have many common sources and could be controlled using similar removal technologies. To better inform NMVOC/IVOC control policies, it is needed in future studies to perform a detailed quantification of the individual contributions of NMVOC and IVOC emissions from various sources to PM<sub>2.5</sub> concentrations. We have described this limitation at the end of the revised manuscript (Page 21, Line 23-27).

Page 18, Line 24 I agree NO<sub>x</sub> reduction is necessary in the long run. However, it could increase PM<sub>2.5</sub> emissions in the near term with slight reduction. How should such adverse effects be considered? Any messages on this issue?

Response: We suggest that, in the long run, NO<sub>x</sub> emissions should be substantially reduced, preferably approach their maximum feasible reduction levels, in both the BTH and other parts of China. In the short term, we should also implement simultaneous NO<sub>x</sub> reductions in both the BTH and other regions in order to avoid the adverse effects. We have added this suggestion to the revised manuscript (Page 21, Line 4-6).

Page 18, Line 26 I feel the importance of Southern Hebei is not so discussed in the main text.



Response: We have better discussed the importance of Southern Hebei in the revised manuscript (Page 15, Line 21-27):

The precursor emissions from the northern part of BTH (e.g., Northern Hebei, Beijing) mainly contribute to local PM<sub>2.5</sub> concentrations, whereas those from the southern part of BTH (e.g., Southern Hebei) significantly affect the PM<sub>2.5</sub> concentrations in both the local region and other regions. Over the BTH, heavy pollution is frequently associated with southerly wind while strong northerly wind often blows away PM<sub>2.5</sub> pollution (Jia et al., 2008; Zheng et al., 2015), which explains the higher contribution of emissions from southern BTH to other regions.

#### Technical corrections

Page 6, Line 17 originally -> originally

Response: Revision has been made.

#### References

- Cheng, Y. F., Zheng, G. J., Wei, C., Mu, Q., Zheng, B., Wang, Z. B., Gao, M., Zhang, Q., He, K. B., Carmichael, G., Pöschl, U., and Su, H.: Reactive nitrogen chemistry in aerosol water as a source of sulfate during haze events in China, *Sci Adv*, 2, e1601530, DOI: 10.1126/sciadv.1601530, 2016.
- Fu, X., Wang, S. X., Zhao, B., Xing, J., Cheng, Z., Liu, H., and Hao, J. M.: Emission inventory of primary pollutants and chemical speciation in 2010 for the Yangtze River Delta region, China, *Atmos Environ*, 70, 39-50, DOI 10.1016/j.atmosenv.2012.12.034, 2013.
- Fu, X., Wang, S. X., Ran, L., Pleim, J. E., Cooter, E., Bash, J. O., Benson, V., and Hao, J. M.: Estimating NH<sub>3</sub> emissions from agricultural fertilizer application in China using the bi-directional CMAQ model coupled to an agro-ecosystem model, *Atmos Chem Phys*, 15, 6637-6649, DOI 10.5194/acp-15-6637-2015, 2015.
- Fu, X., Wang, S. X., Chang, X., Cai, S. Y., Xing, J., and Hao, J. M.: Modeling analysis of secondary inorganic aerosols over China: pollution characteristics, and meteorological and dust impacts, *Sci Rep-Uk*, 6, 10.1038/srep35992, 2016.
- Gao, Y., Zhao, C., Liu, X. H., Zhang, M. G., and Leung, L. R.: WRF-Chem simulations of aerosols and anthropogenic aerosol radiative forcing in East Asia, *Atmos Environ*, 92, 250-266, DOI 10.1016/j.atmosenv.2014.04.038, 2014.
- Gordon, T. D., Presto, A. A., May, A. A., Nguyen, N. T., Lipsky, E. M., Donahue, N. M., Gutierrez, A., Zhang, M., Maddox, C., Rieger, P., Chattopadhyay, S., Maldonado, H., Maricq, M. M., and Robinson, A. L.: Secondary organic aerosol formation exceeds primary particulate matter emissions for light-duty gasoline vehicles, *Atmos Chem Phys*, 14, 4661-4678, DOI 10.5194/acp-14-4661-2014, 2014a.
- Gordon, T. D., Presto, A. A., Nguyen, N. T., Robertson, W. H., Na, K., Sahay, K. N., Zhang, M., Maddox, C., Rieger, P., Chattopadhyay, S., Maldonado, H., Maricq, M. M., and Robinson, A. L.: Secondary organic aerosol production from diesel vehicle exhaust: impact of aftertreatment, fuel chemistry and driving cycle, *Atmos Chem Phys*, 14, 4643-4659, DOI 10.5194/acp-14-4643-2014, 2014b.
- Hennigan, C. J., Miracolo, M. A., Engelhart, G. J., May, A. A., Presto, A. A., Lee, T., Sullivan, A. P., McMeeking, G. R., Coe, H., Wold, C. E., Hao, W. M., Gilman, J. B., Kuster, W. C., de Gouw, J.,

- Schichtel, B. A., Collett, J. L., Kreidenweis, S. M., and Robinson, A. L.: Chemical and physical transformations of organic aerosol from the photo-oxidation of open biomass burning emissions in an environmental chamber, *Atmos Chem Phys*, 11, 7669-7686, DOI 10.5194/acp-11-7669-2011, 2011.
- Huang, X., Song, Y., Li, M. M., Li, J. F., Huo, Q., Cai, X. H., Zhu, T., Hu, M., and Zhang, H. S.: A high-resolution ammonia emission inventory in China, *Global Biogeochem Cy*, 26, GB1030, DOI 10.1029/2011gb004161, 2012.
- Jathar, S. H., Gordon, T. D., Hennigan, C. J., Pye, H. O. T., Pouliot, G., Adams, P. J., Donahue, N. M., and Robinson, A. L.: Unspeciated organic emissions from combustion sources and their influence on the secondary organic aerosol budget in the United States, *P Natl Acad Sci USA*, 111, 10473-10478, DOI 10.1073/pnas.1323740111, 2014.
- Jia, Y. T., Rahn, K. A., He, K. B., Wen, T. X., and Wang, Y. S.: A novel technique for quantifying the regional component of urban aerosol solely from its sawtooth cycles, *J Geophys Res-Atmos*, 113, 10.1029/2008jd010389, 2008.
- Qin, Y., and Xie, S. D.: Historical estimation of carbonaceous aerosol emissions from biomass open burning in China for the period 1990-2005, *Environ Pollut*, 159, 3316-3323, DOI 10.1016/j.envpol.2011.08.042, 2011.
- Wang, G. H., Zhang, R. Y., Gomez, M. E., Yang, L. X., Zamora, M. L., Hu, M., Lin, Y., Peng, J. F., Guo, S., Meng, J. J., Li, J. J., Cheng, C. L., Hu, T. F., Ren, Y. Q., Wang, Y. S., Gao, J., Cao, J. J., An, Z. S., Zhou, W. J., Li, G. H., Wang, J. Y., Tian, P. F., Marrero-Ortiz, W., Secrest, J., Du, Z. F., Zheng, J., Shang, D. J., Zeng, L. M., Shao, M., Wang, W. G., Huang, Y., Wang, Y., Zhu, Y. J., Li, Y. X., Hu, J. X., Pan, B., Cai, L., Cheng, Y. T., Ji, Y. M., Zhang, F., Rosenfeld, D., Liss, P. S., Duce, R. A., Kolb, C. E., and Molina, M. J.: Persistent sulfate formation from London Fog to Chinese haze, *P Natl Acad Sci USA*, 113, 13630-13635, 10.1073/pnas.1616540113, 2016.
- Wang, J. D., Zhao, B., Wang, S. X., Yang, F. M., Xing, J., Morawska, L., Ding, A. J., Kulmala, M., Kerminen, V. M., Kujansuu, J., Wang, Z. F., Ding, D. A., Zhang, X. Y., Wang, H. B., Tian, M., Petaja, T., Jiang, J. K., and Hao, J. M.: Particulate matter pollution over China and the effects of control policies, *Sci Total Environ*, 584, 426-447, 10.1016/j.scitotenv.2017.01.027, 2017.
- Wang, L. T., Jang, C., Zhang, Y., Wang, K., Zhang, Q. A., Streets, D., Fu, J., Lei, Y., Schreifels, J., He, K. B., Hao, J. M., Lam, Y. F., Lin, J., Meskhidze, N., Voorhees, S., Evarts, D., and Phillips, S.: Assessment of air quality benefits from national air pollution control policies in China. Part II: Evaluation of air quality predictions and air quality benefits assessment, *Atmos Environ*, 44, 3449-3457, DOI 10.1016/j.atmosenv.2010.05.058, 2010.
- Wang, S. X., and Zhang, C. Y.: Spatial and temporal distribution of air pollutant emissions from open burning of crop residues in China, *Sciencepaper Online*, 3, 1-6, 2008.
- Wang, S. X., Xing, J., Chatani, S., Hao, J. M., Klimont, Z., Cofala, J., and Amann, M.: Verification of anthropogenic emissions of China by satellite and ground observations, *Atmos Environ*, 45, 6347-6358, DOI 10.1016/j.atmosenv.2011.08.054, 2011a.
- Wang, S. X., Xing, J., Jang, C. R., Zhu, Y., Fu, J. S., and Hao, J. M.: Impact assessment of ammonia emissions on inorganic aerosols in east China using response surface modeling technique, *Environ Sci Technol*, 45, 9293-9300, DOI 10.1021/Es2022347, 2011b.
- Wang, Y., Zhang, Q. Q., He, K., Zhang, Q., and Chai, L.: Sulfate-nitrate-ammonium aerosols over China: response to 2000-2015 emission changes of sulfur dioxide, nitrogen oxides, and ammonia, *Atmos Chem Phys*, 13, 2635-2652, DOI 10.5194/acp-13-2635-2013, 2013.
- Xing, J., Wang, S. X., Jang, C., Zhu, Y., and Hao, J. M.: Nonlinear response of ozone to precursor emission changes in China: a modeling study using response surface methodology, *Atmos Chem Phys*, 11, 5027-5044, DOI 10.5194/acp-11-5027-2011, 2011.
- Zhao, B., Wang, S. X., Liu, H., Xu, J. Y., Fu, K., Klimont, Z., Hao, J. M., He, K. B., Cofala, J., and Amann, M.: NO<sub>x</sub> emissions in China: historical trends and future perspectives, *Atmos Chem Phys*, 13, 9869-9897, DOI 10.5194/acp-13-9869-2013, 2013a.

- Zhao, B., Wang, S. X., Wang, J. D., Fu, J. S., Liu, T. H., Xu, J. Y., Fu, X., and Hao, J. M.: Impact of national NO<sub>x</sub> and SO<sub>2</sub> control policies on particulate matter pollution in China, *Atmos Environ*, 77, 453-463, DOI 10.1016/j.atmosenv.2013.05.012, 2013b.
- Zhao, B., Wang, S. X., Donahue, N. M., Jathar, S. H., Huang, X. F., Wu, W. J., Hao, J. M., and Robinson, A. L.: Quantifying the effect of organic aerosol aging and intermediate-volatility emissions on regional-scale aerosol pollution in China, *Sci Rep-Uk*, 6, 10.1038/srep28815, 2016.
- Zheng, G. J., Duan, F. K., Su, H., Ma, Y. L., Cheng, Y., Zheng, B., Zhang, Q., Huang, T., Kimoto, T., Chang, D., Poschl, U., Cheng, Y. F., and He, K. B.: Exploring the severe winter haze in Beijing: the impact of synoptic weather, regional transport and heterogeneous reactions, *Atmos Chem Phys*, 15, 2969-2983, 10.5194/acp-15-2969-2015, 2015.
